# Supplementary material for: Mixing and matching N,N- and N,O-chelates in anionic Mg(i) compounds: synthesis and reactivity with RNCNR and CO
Source: Royal Society of Chemistry journal article supplement (doi:10.1039/d4cc02594f), 2024-01-01
Supplement: d4cc02594f1.pdf [file d4cc02594f1.pdf]

## Mixing and Matching *N,N*- and *N,O*-Chelates in Anionic Mg(I) Compounds: Synthesis and Reactivity with $\text{RN}=\text{C}=\text{NR}$ and CO

### Table of Contents:

|     |                                                                                                                        |
|-----|------------------------------------------------------------------------------------------------------------------------|
| S3  | General Experimental Procedures                                                                                        |
|     | Experimental Details for $[\text{Mg}(\text{NON})_2]_2$ <b>1</b> .                                                      |
|     | <i>Oxford Procedure</i>                                                                                                |
| S4  | <i>Wellington Procedure</i>                                                                                            |
| S5  | <b>Figure S1</b> $^1\text{H}$ NMR spectrum of <b>1</b> ( <i>THF-solvated</i> )                                         |
| S6  | <b>Figure S2</b> $^{13}\text{C}\{^1\text{H}\}$ NMR spectrum of <b>1</b> ( <i>THF-solvated 1</i> )                      |
| S7  | <b>Figure S3</b> $^1\text{H}$ NMR spectrum of <b>1</b> ( <i>high temp</i> )                                            |
| S8  | <b>Figure S4</b> $^{13}\text{C}\{^1\text{H}\}$ NMR spectrum of <b>1</b> ( <i>high temp</i> )                           |
| S9  | <b>Figure S5</b> $^1\text{H}$ NMR spectrum of <b>1</b> ( <i>partially THF-solvated 1, high temp</i> )                  |
| S10 | <b>Figure S6</b> $^{13}\text{C}\{^1\text{H}\}$ NMR spectrum of <b>1</b> ( <i>partially THF-solvated 1, high temp</i> ) |
| S11 | <b>Figure S7</b> IR spectrum of <b>1</b>                                                                               |
| S12 | <b>Figure S8</b> Thermal ellipsoid plot of the asymmetric unit of <b>1</b>                                             |
| S13 | Experimental Details for <b>A</b>                                                                                      |
| S14 | <b>Figure S9</b> $^1\text{H}$ NMR spectrum of <b>A</b>                                                                 |
| S15 | <b>Figure S10</b> $^{13}\text{C}\{^1\text{H}\}$ NMR spectrum of <b>A</b>                                               |
| S16 | <b>Figure S11</b> IR spectrum of <b>A</b>                                                                              |
| S17 | Experimental Details for <b>2</b>                                                                                      |
| S18 | <b>Figure S12</b> $^1\text{H}$ NMR spectrum of <b>2</b>                                                                |
| S19 | <b>Figure S13</b> $^{13}\text{C}\{^1\text{H}\}$ NMR spectrum of <b>2</b>                                               |
| S20 | <b>Figure S14</b> IR spectrum of <b>2</b>                                                                              |
| S21 | <b>Figure S15</b> Thermal ellipsoid plot of the asymmetric unit of <b>2</b>                                            |
| S22 | Experimental Details for <b>3</b> ·Et <sub>2</sub> O                                                                   |
| S23 | <b>Figure S16</b> $^1\text{H}$ NMR spectrum of <b>3</b> ·Et <sub>2</sub> O                                             |
| S24 | <b>Figure S17</b> $^{13}\text{C}\{^1\text{H}\}$ NMR spectrum of <b>3</b> ·Et <sub>2</sub> O                            |
| S25 | <b>Figure S18</b> IR spectrum of <b>3</b> ·Et <sub>2</sub> O                                                           |
| S26 | <b>Figure S19</b> Thermal ellipsoid plot of the asymmetric unit of <b>3</b> ·Et <sub>2</sub> O                         |
| S27 | Experimental Details for <b>4</b> ·THF                                                                                 |
| S28 | <b>Figure S20</b> $^1\text{H}$ NMR spectrum of <b>4</b> ·THF                                                           |
| S29 | <b>Figure S21</b> $^{13}\text{C}\{^1\text{H}\}$ NMR spectrum of <b>4</b> ·THF                                          |
| S30 | <b>Figure S22</b> IR spectrum of <b>4</b> ·THF                                                                         |
| S31 | <b>Figure S23</b> Thermal ellipsoid plot of the asymmetric unit of <b>4</b> ·THF                                       |
| S32 | <b>Figure S24</b> Residual electron density for <b>4</b> ·THF <b>4</b> ·THF                                            |
| S33 | Crystallographic Details                                                                                               |
| S34 | <b>Table S1</b> Crystal structure and refinement data for <b>1</b> and <b>2</b>                                        |
| S35 | <b>Table S2</b> Crystal structure and refinement data for <b>3</b> ·Et <sub>2</sub> O and <b>4</b> ·THF                |
| S36 | Computational Details                                                                                                  |

|     |                                                                                                                                   |
|-----|-----------------------------------------------------------------------------------------------------------------------------------|
| S37 | NBO Analysis of $[\text{K}(\text{THF})_2]_2[(\text{NNO})\text{Mg}-\text{Mg}(\text{NNO})]$ $\mathbf{4}\cdot\text{THF}$             |
|     | <b>Figure S25</b> NBO162 of DFT optimized $\mathbf{4}\cdot\text{THF}$                                                             |
| S38 | QTAIM Analysis of $[\text{K}(\text{THF})_2]_2[(\text{NNO})\text{Mg}-\text{Mg}(\text{NNO})]$ $\mathbf{4}\cdot\text{THF}$           |
|     | <b>Figure S26</b> Contour plots, $\rho(\mathbf{r})$ and $\nabla^2\rho(\mathbf{r})$ , of DFT optimized $\mathbf{4}\cdot\text{THF}$ |
| S39 | <b>Figure S27</b> Contour plot, $\rho(\mathbf{r})$ of the core of DFT optimized $\mathbf{4}\cdot\text{THF}$                       |
| S40 | <b>Figure S28</b> Contour plot $\nabla^2\rho(\mathbf{r})$ of the core of DFT optimized $\mathbf{4}\cdot\text{THF}$                |
| S41 | <b>Table S3</b> Selected BCP data for $\mathbf{4}\cdot\text{THF}$                                                                 |
| S42 | <b>Table S4</b> Selected QTAIM atomic data for $\mathbf{4}\cdot\text{THF}$                                                        |
| S43 | References                                                                                                                        |
| S44 | Computed Energies and Cartesian Coordinates for $\mathbf{4}\cdot\text{THF}$                                                       |

## General Synthetic Procedures

All manipulations were performed using standard Schleck line techniques under dry argon atmosphere or in standard nitrogen-filled glovebox. Deuterated solvents were obtained from Sigma-Aldrich. Deuterated benzene was degassed on the Schleck line using freeze-pump-thaw method. Toluene, diethyl ether (Et<sub>2</sub>O) and tetrahydrofuran (THF) were obtained from a PureSolv MD 5 system and dried over 5 Å molecular sieves for 24 hours prior to use. Anhydrous benzene was obtained from Sigma-Aldrich and used without further purification. NMR spectra were recorded with a Jeol JNM-ECZ500S 500 MHz spectrometer at ambient temperature (294K) unless stated otherwise. Chemical shifts are reported in δ (ppm) and coupling constants are reported in Hz, proton and carbon chemical shifts are referenced internally to residual solvent signals.

Di-*n*-butylmagnesium<sup>S1</sup> and (NON)H<sub>2</sub><sup>S2</sup> were synthesised according to literature procedures.

### Experimental Details for [Mg(NON)]<sub>2</sub> 1.

*UK (Oxford) Procedure.*

A solution of di-*n*-butylmagnesium in hexanes (2.75 mL of a 0.75 M solution, 2.06 mmol, 1 eq.) was added dropwise to a stirred solution of (NON)H<sub>2</sub> (1.00 g, 2.06 mmol, 1 eq.) in hexanes (3 mL) at 25 °C. The reaction mixture was stirred for 30 minutes then left to stand for 16 h, resulting in the formation of a white crystalline solid. The solution was decanted and the solid washed with cold *n*-pentane (3 x 0.5 mL), then dried *in vacuo* for 3 h. [Mg(NON)]<sub>2</sub> (0.562 g, 54%) was isolated as a white crystalline solid. Single crystals suitable for an X-ray diffraction study were grown by dissolving a sample in benzene at 80 °C followed by slow cooling to room temperature. NMR data was collected in THF-D<sub>8</sub> to facilitate solubility. However, in this solvent compound **1** exists as the THF adduct, Mg(NON)(THF)<sub>*n*</sub>.

<sup>1</sup>H NMR (600 MHz, THF-D<sub>8</sub>, 298 K): δ (ppm) 6.88 (d, *J* = 7.5, 8H, *m*-C<sub>6</sub>H<sub>3</sub>), 6.62 (t, *J* = 7.5, 4H, *p*-C<sub>6</sub>H<sub>3</sub>), 4.04 (sept, *J* = 6.9, 8H, CHMe<sub>2</sub>), 1.18 (d, *J* = 6.9, 24H, CHMe<sub>2</sub>), 1.09 (d, *J* = 6.9, 24H, CHMe<sub>2</sub>), 0.12 (s, 24H, SiMe<sub>2</sub>).

<sup>13</sup>C{<sup>1</sup>H} NMR (151 MHz, THF-D<sub>8</sub>, 298 K): δ (ppm) 150.1, 144.7, 123.6, 119.3 (C<sub>6</sub>H<sub>3</sub>), 27.4 (CHMe<sub>2</sub>), 26.5, 26.1 (CHMe<sub>2</sub>), 4.6 (SiMe<sub>2</sub>). <sup>29</sup>Si NMR (119 MHz, THF-D<sub>8</sub>, 298 K): δ (ppm) – 14.75 (OSiMe<sub>2</sub>N).

Anal. calcd. for  $C_{56}H_{92}Mg_2N_4O_2Si_4$ : C, 66.31; H, 9.14; N, 5.52. Found: C, 65.92; H, 9.58; N, 5.09.

*New Zealand (Wellington) Procedure.*

A solution of (NON)H<sub>2</sub> (0.70 g, 1.44 mmol, 1 eq.) in toluene was added to a suspension of Mg(<sup>n</sup>Bu)<sub>2</sub> (0.20 g, 1.44 mmol, 1 eq.) in toluene. The reaction mixture was stirred for 2 days at 60 °C to give a white suspension. The suspension was allowed to settle, and the white solid was isolated. The solid was washed 3 times with cold toluene and dried *in vacuo* to give a white powder. Yield = 0.451 g, 60%. NMR data was collected in a mixture of C<sub>6</sub>D<sub>6</sub>:THF-D<sub>8</sub> (~5:1) at 323 K to facilitate solubility. However, in this solvent mixture the compound exists as a (partially) solvated THF adduct, Mg(NON)(THF)<sub>n</sub>.

<sup>1</sup>H NMR (500 MHz, C<sub>7</sub>D<sub>8</sub>, 373 K): δ (ppm) 6.96 (d, *J* = 7.6, 4H, C<sub>6</sub>H<sub>3</sub>), 6.88 (t, *J* = 7.6, 2H, C<sub>6</sub>H<sub>3</sub>), 3.57 (sept, *J* = 6.9, 4H, CHMe<sub>2</sub>), 1.07 (br. s, 24H, CHMe<sub>2</sub>), 0.39 (s, 12H, SiMe<sub>2</sub>).

<sup>13</sup>C{<sup>1</sup>H} NMR (126 MHz, C<sub>7</sub>D<sub>8</sub>, 373 K): δ (ppm) 145.4, 143.7, 124.0, 122.0 (C<sub>6</sub>H<sub>3</sub>), 28.7 (CHMe<sub>2</sub>), 24.8 (CHMe<sub>2</sub>), 3.8 (SiMe<sub>2</sub>).

<sup>1</sup>H NMR (500 MHz, C<sub>6</sub>D<sub>6</sub>:THF-D<sub>8</sub> (~5:1), 323 K): δ (ppm) 7.02 (d, *J* = 7.6, 8H, C<sub>6</sub>H<sub>3</sub>), 6.88 (t, *J* = 7.6, 4H, C<sub>6</sub>H<sub>3</sub>), 3.91 (br. s, 8H, CHMe<sub>2</sub>), 1.27 (d, *J* = 6.9, 24H, CHMe<sub>2</sub>), 1.03 (br. s, 24H, CHMe<sub>2</sub>), 0.42 (br. s, 24H, SiMe<sub>2</sub>).

<sup>13</sup>C{<sup>1</sup>H} NMR (126 MHz, C<sub>6</sub>D<sub>6</sub>:THF-D<sub>8</sub> (~5:1), 323 K): δ (ppm) 148.6, 144.8, 123.8, 121.1 (C<sub>6</sub>H<sub>3</sub>), 27.4 (CHMe<sub>2</sub>), 25.8, 25.3 (CHMe<sub>2</sub>), 3.9 (br, SiMe<sub>2</sub>).

IR (solid, cm<sup>-1</sup>): 2960 (m), 2867 (w), 1458 (m), 1313 (w), 1257 (s), 1040 (m), 848 (m), 818 (m), 745 (s), 542 (w).

**Figure S1**  $^1\text{H}$  NMR spectrum (600 MHz, THF- $\text{D}_8$ , 298 K) of THF-solvated **1** ( $\dagger n$ -hexane, \* THF- $\text{D}_8$ ).

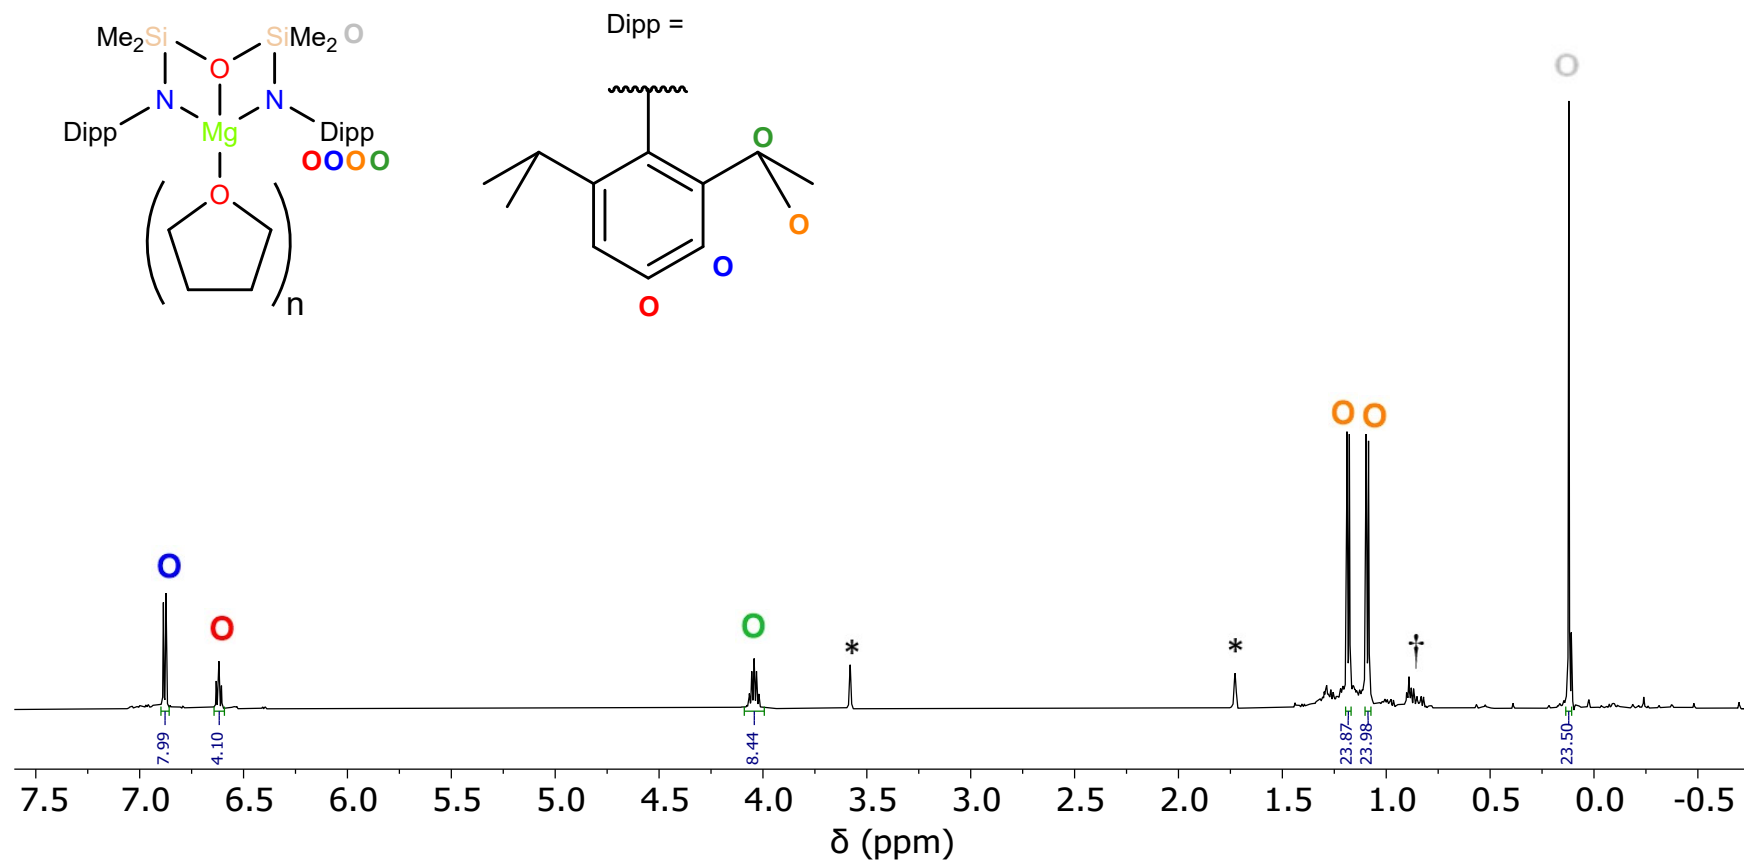

**Figure S2**  $^{13}\text{C}\{^1\text{H}\}$  NMR spectrum (151 MHz, THF- $\text{D}_8$ , 298 K) of THF-solvated **1** (‡ silicone grease, † *n*-hexane, \* THF- $\text{D}_8$ ).

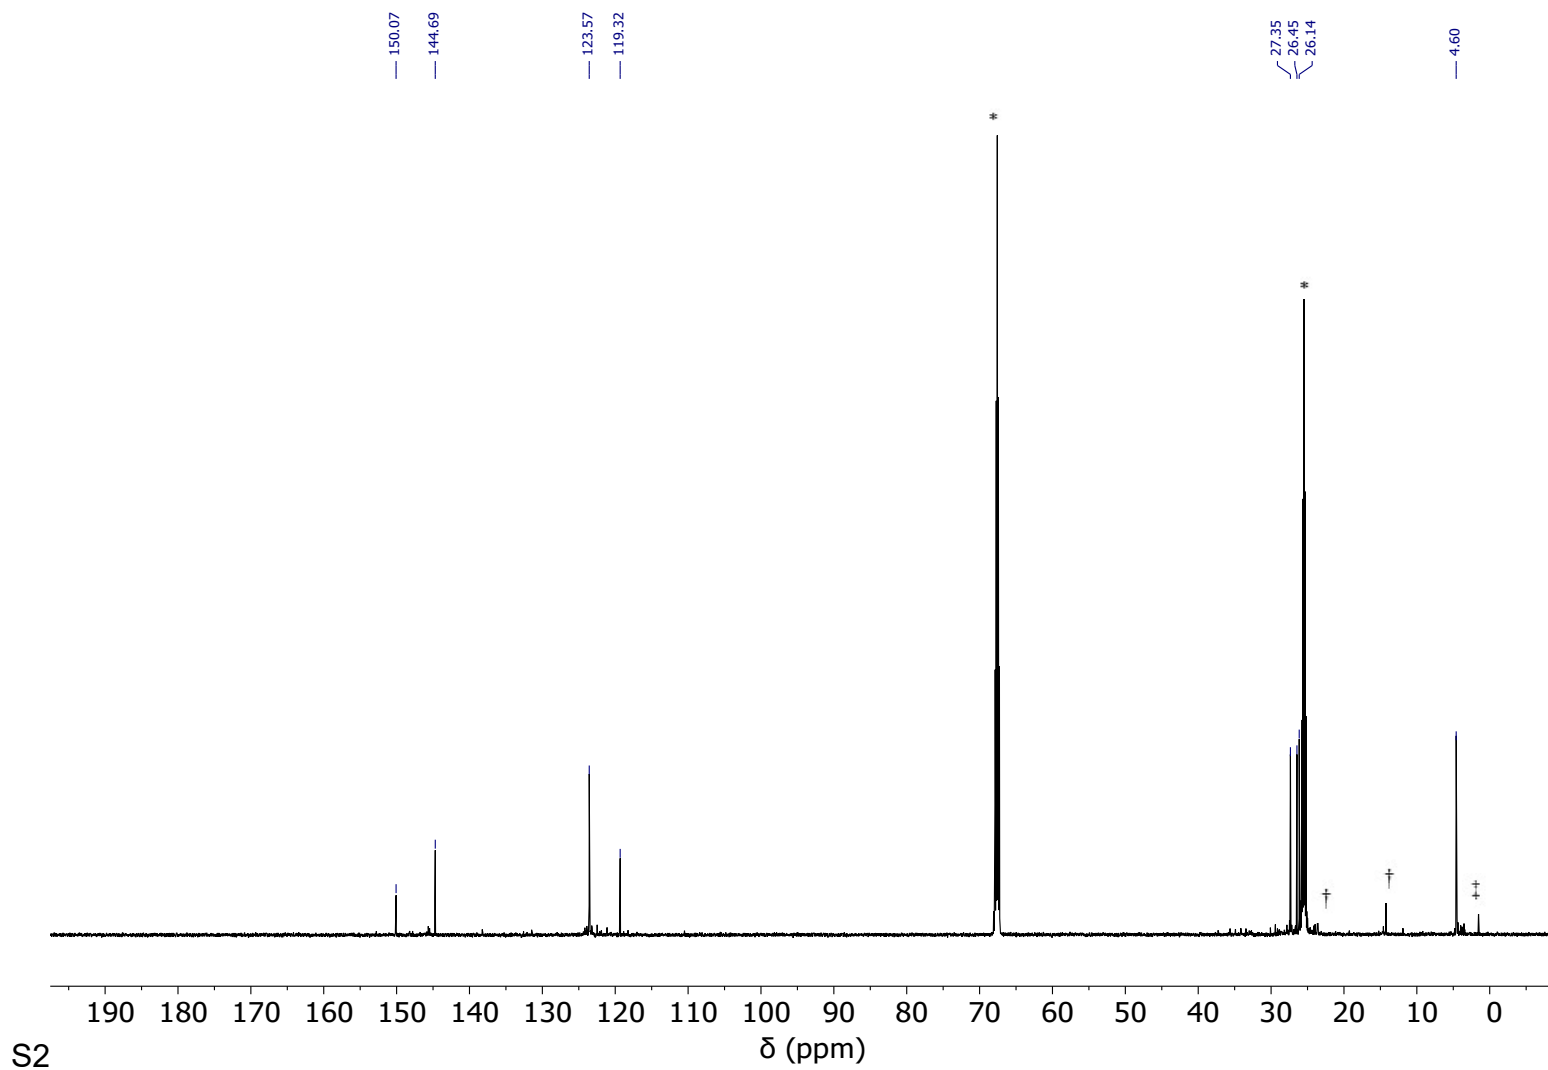

S2

S6

**Figure S3**  $^1\text{H}$  NMR spectrum (500 MHz,  $\text{C}_7\text{D}_8$ , 373 K) of **1** (high temperature).

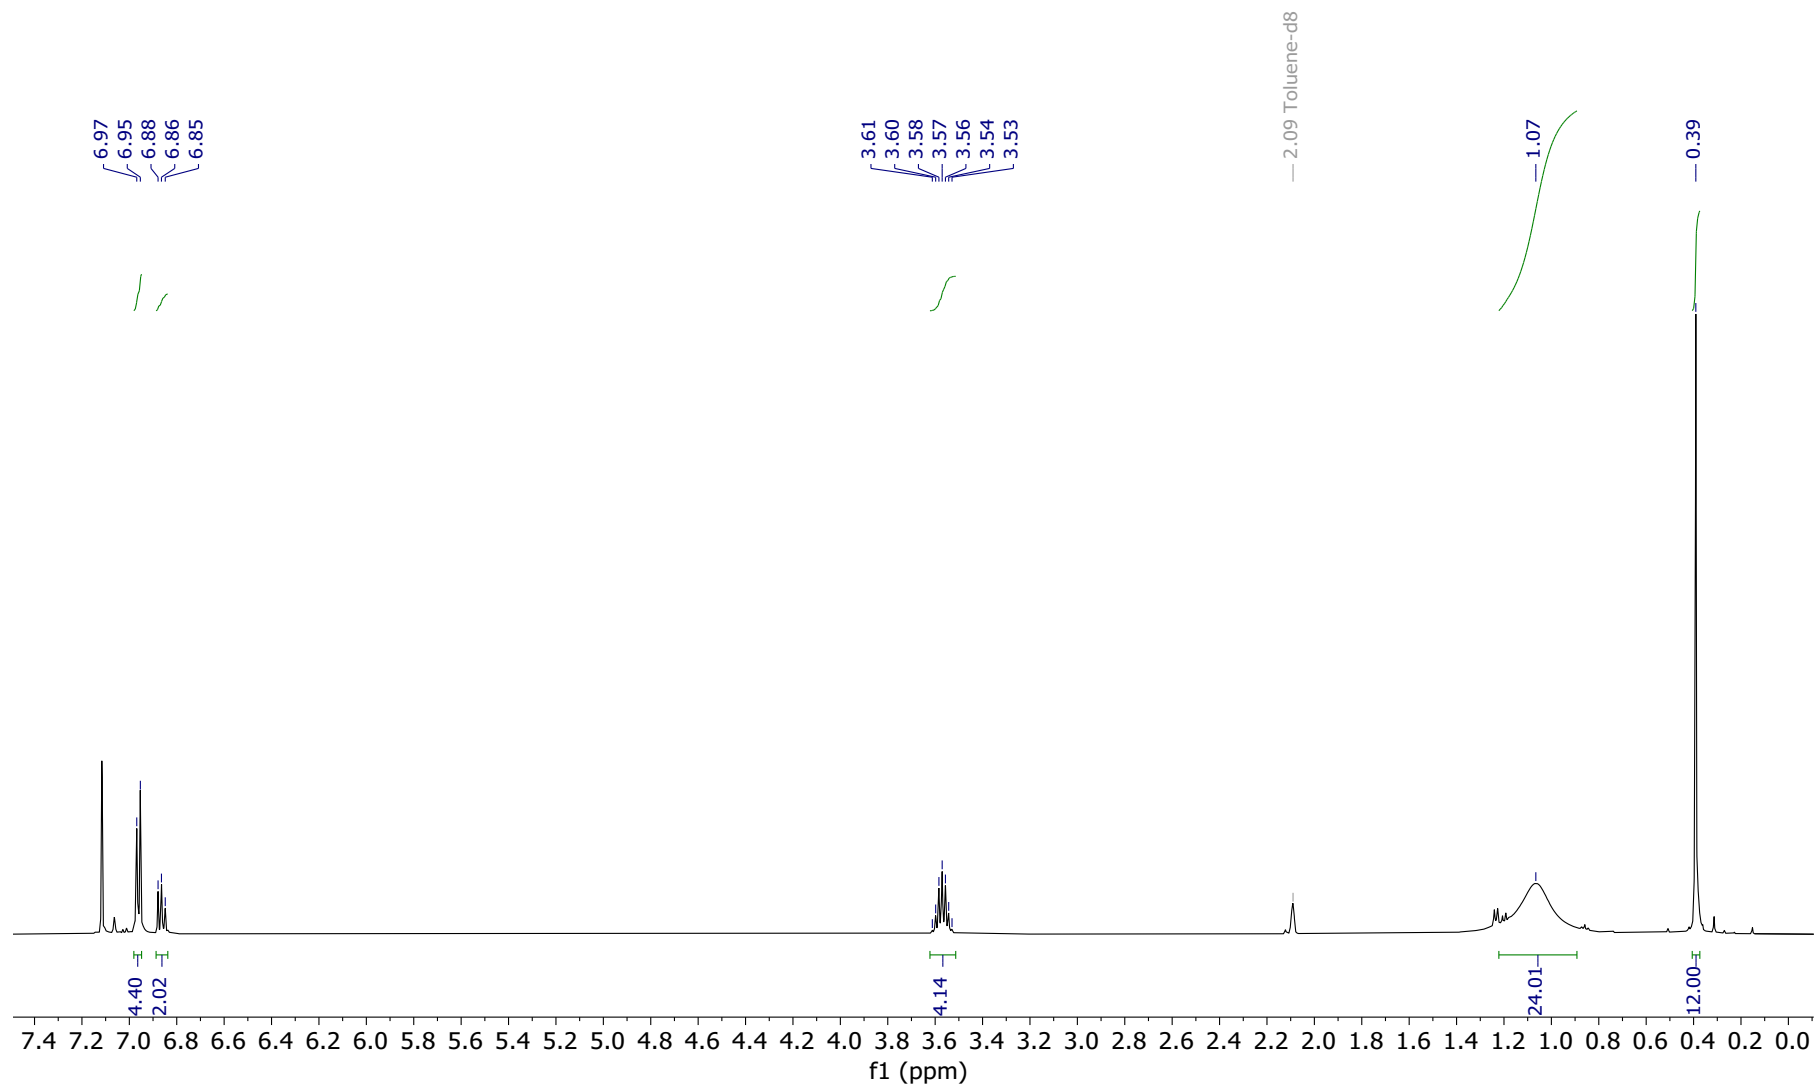

**Figure S4**  $^{13}\text{C}\{^1\text{H}\}$  NMR spectrum (126 MHz,  $\text{C}_7\text{D}_8$ , 373 K) of **1** (high temperature).

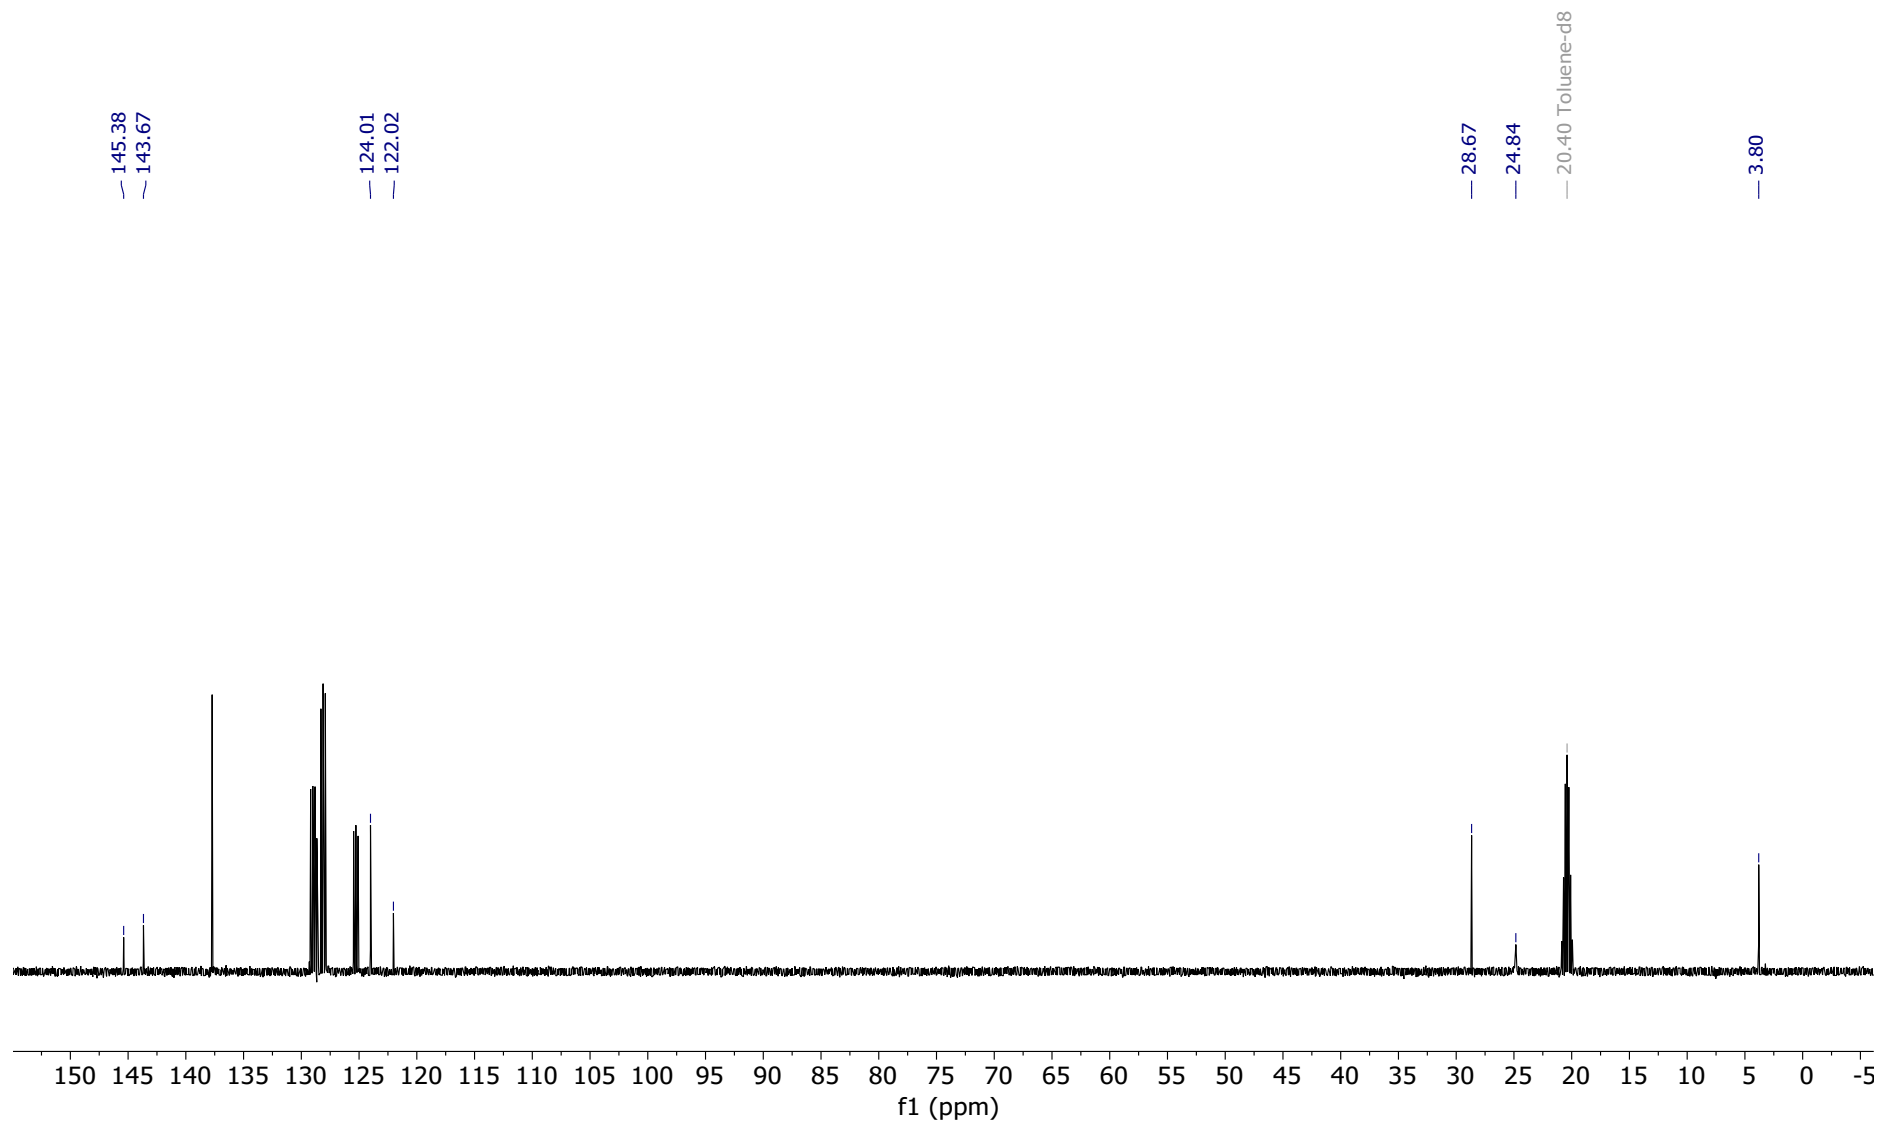



**Figure S5**  $^1\text{H}$  NMR spectrum (500 MHz,  $\text{C}_6\text{D}_6$ :THF- $\text{D}_8$  (~5:1), 323 K) of (partially THF-solvated) **1**.

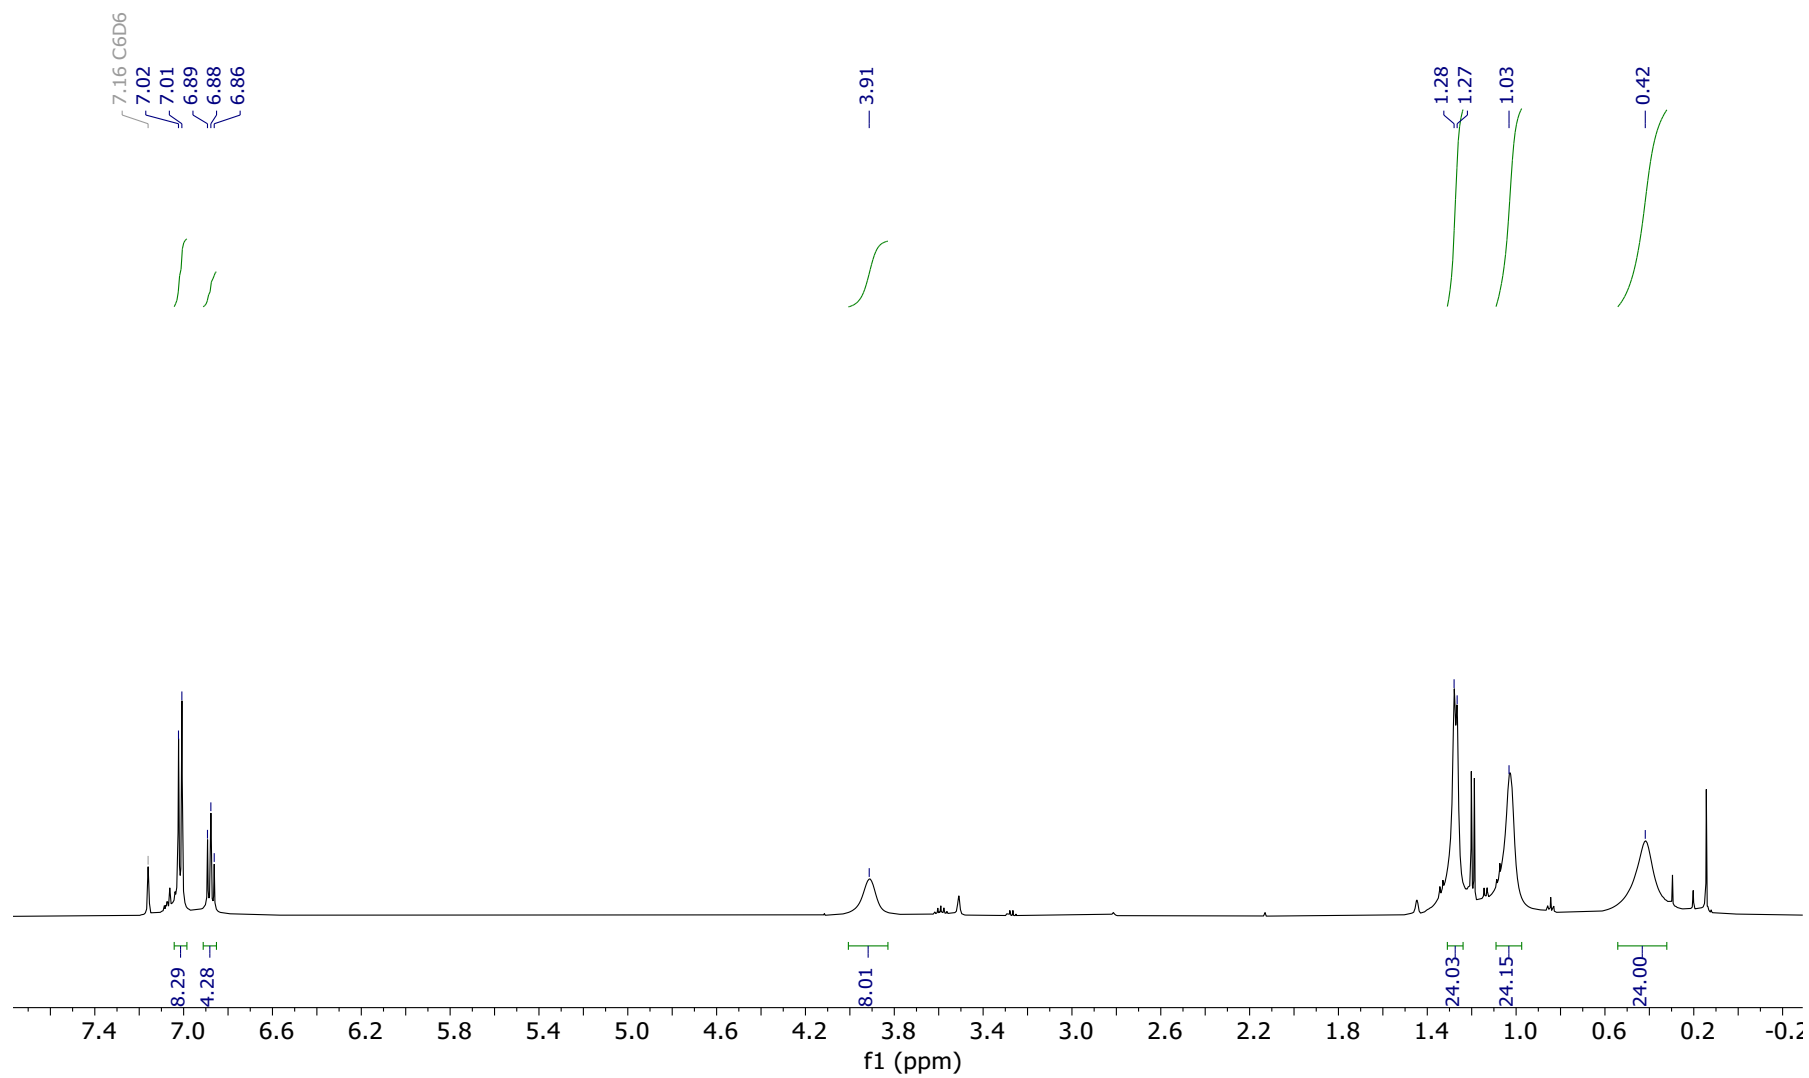

**Figure S6**  $^{13}\text{C}\{^1\text{H}\}$  NMR spectrum (126 MHz,  $\text{C}_6\text{D}_6:\text{THF-D}_8$  (~5:1), 323 K) of (partially THF-solvated) **1**.

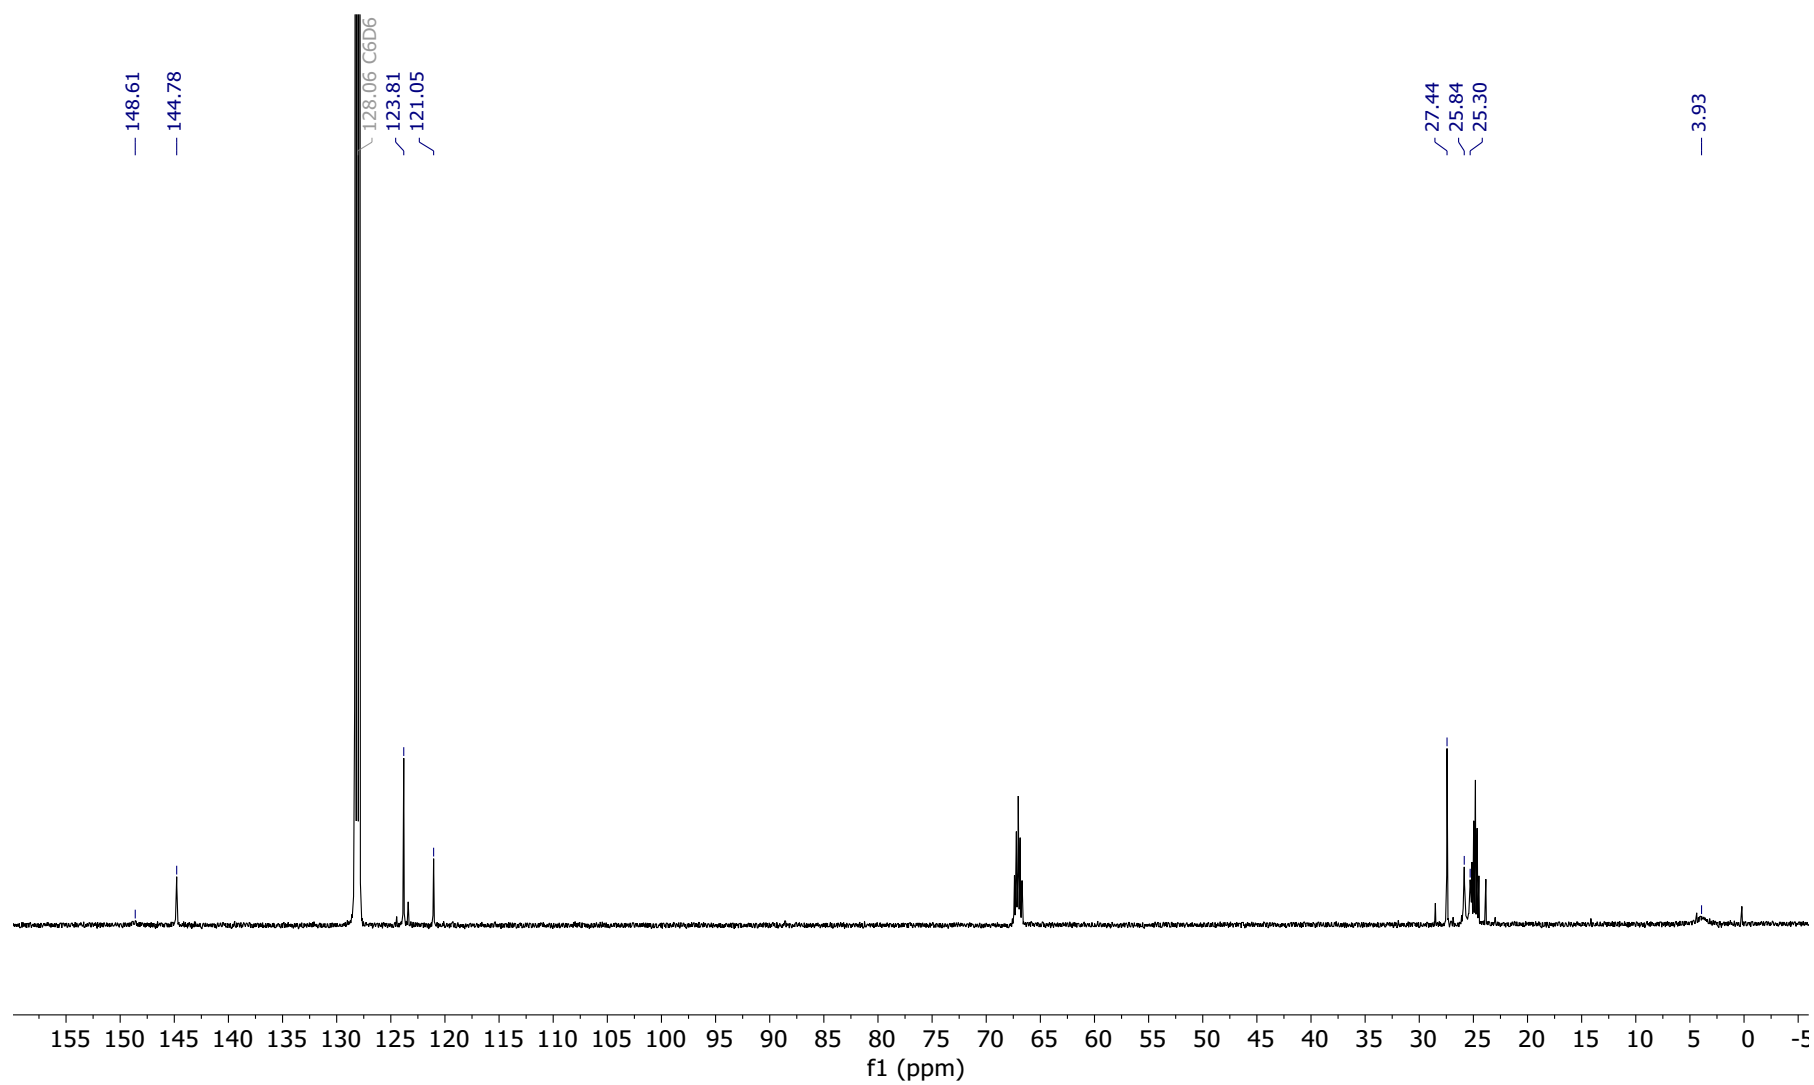

Figure S7 IR spectrum (solid sample) of 1.

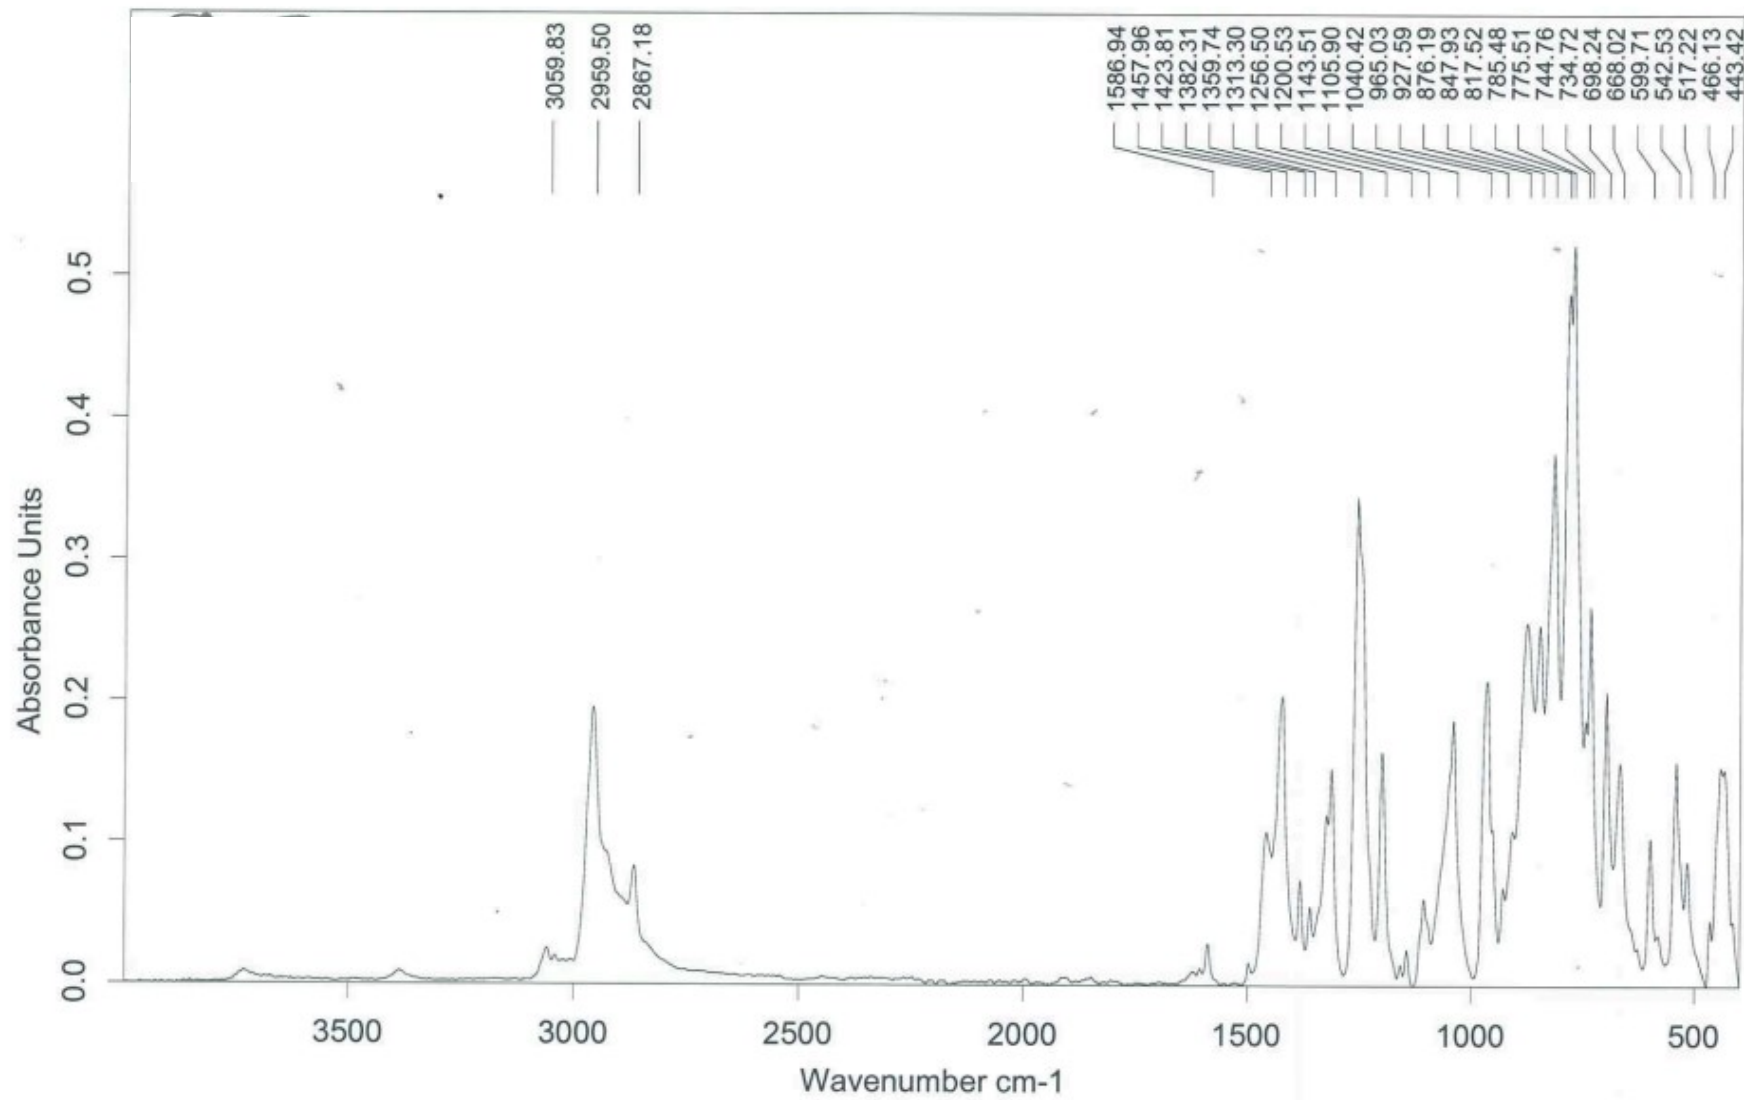

**Figure S8** ORTEP (ellipsoids 30%, H-atoms omitted), of the asymmetric unit of  $[\text{Mg}(\text{NON})]_2$  **1**.

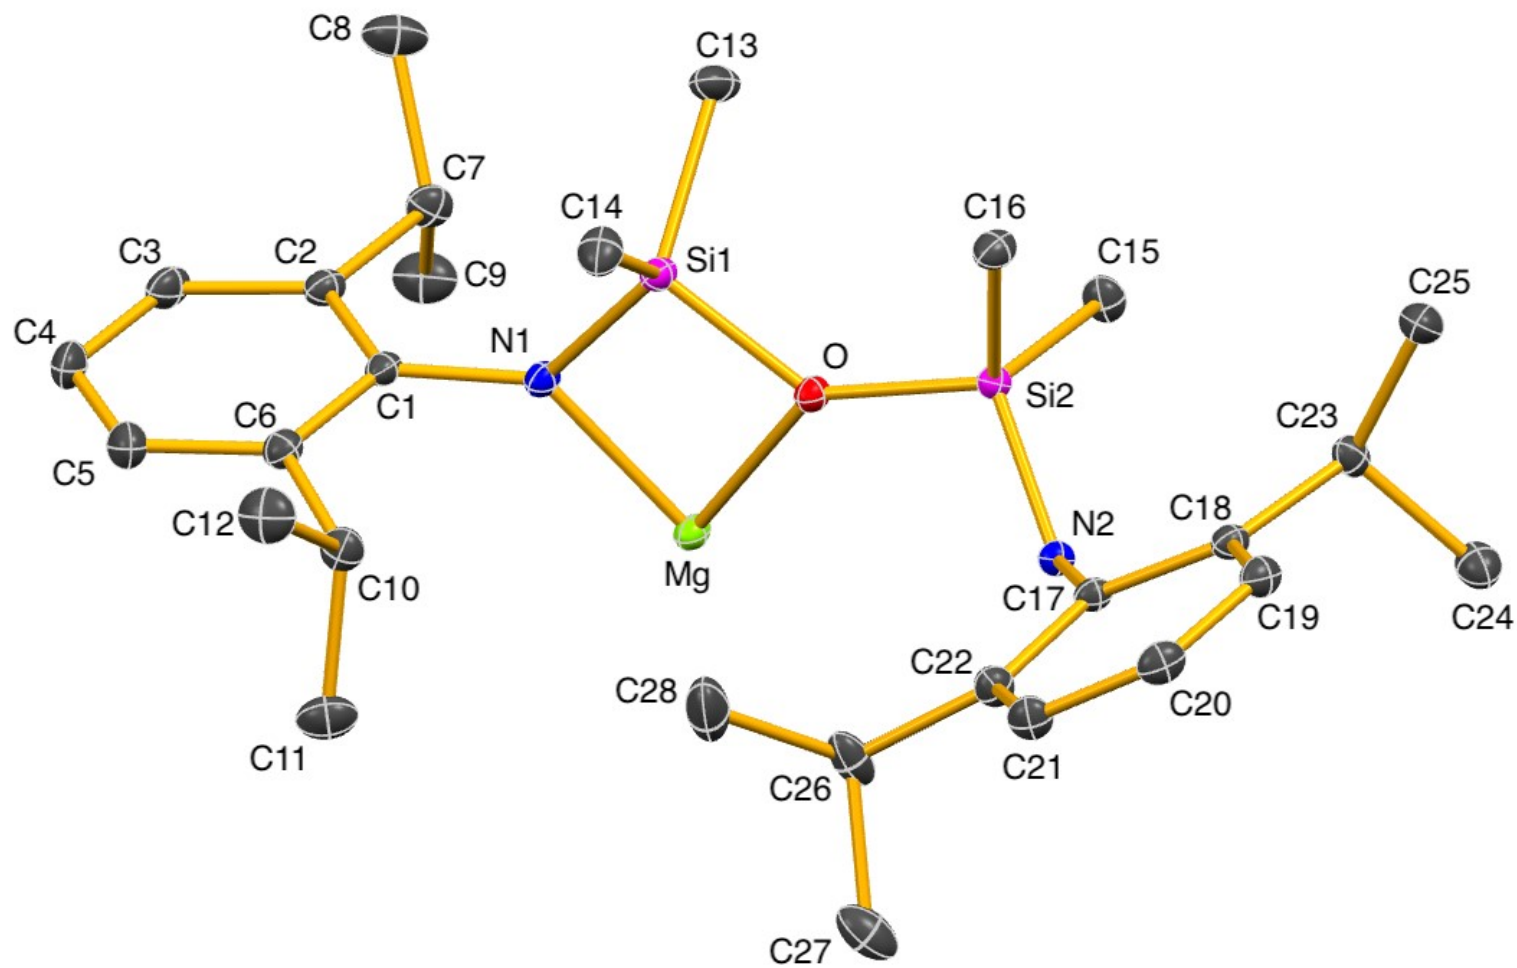

**Experimental Details for A** (containing  $[\text{K}(\text{Et}_2\text{O})_n][\text{Mg}(\text{NON})]$  and  $[\text{K}(\text{Et}_2\text{O})_n][\text{Mg}(\text{NNO})]$ ).

A white suspension of  $[\text{Mg}(\text{NON})]_2$  (162.9 mg, 0.16 mmol) in diethyl ether was added to a suspension of  $\text{KC}_8$  (129.8 mg, 0.96 mmol) in  $\text{Et}_2\text{O}$  while stirring at room temperature. The reaction mixture was stirred for *ca.* 3 hrs. The reaction mixture was allowed to settle and filtered through celite to afford a bright yellow solution. The solvent was removed *in vacuo* to afford a bright yellow powder. Yield = 76.5 mg, 44%.

M.Pt: >260 °C (decomp.).

$^1\text{H}$  NMR (500 MHz,  $\text{C}_6\text{D}_6$ ):  $\delta$  (ppm) 7.15 (m, 3H,  $\text{C}_6\text{H}_3$ ), 6.82 (m, 6H,  $\text{C}_6\text{H}_3$ ), 6.45 (t,  $J = 7.6$ , 1H,  $\text{C}_6\text{H}_3$ ), 6.40 (t,  $J = 7.6$ , 2H,  $\text{C}_6\text{H}_3$ ), 4.35 (br. sept, 4H,  $\text{CHMe}_2$ ), 4.04 (sept\*, 4H,  $\text{CHMe}_2$ ), 1.36 (d,  $J = 6.9$ , 6H,  $\text{CHMe}_2$ ), 1.31 (br. s, 12H,  $\text{CHMe}_2$ ), 1.28 (d,  $J = 6.9$ , 6H,  $\text{CHMe}_2$ ), 1.24 (d,  $J = 6.9$ , 6H,  $\text{CHMe}_2$ ), 1.18 (d,  $J = 6.9$ , 6H,  $\text{CHMe}_2$ ), 0.38 (s, 12H,  $\text{SiMe}_2$ ), 0.04 (s, 6H,  $\text{SiMe}_2$ ), -0.04 (s, 6H,  $\text{SiMe}_2$ ).

\* Overlapping septets

$^{13}\text{C}\{^1\text{H}\}$  NMR (126 MHz,  $\text{C}_6\text{D}_6$ )  $\delta$  155.2, 147.4, 147.3, 147.1, 145.5, 123.9, 123.8, 118.5, 117.8 ( $\text{C}_6\text{H}_3$ ), 28.7 ( $\text{CHMe}_2$ ), 28.1, 27.2, 26.6 ( $\text{CHMe}_2$ ), 26.5, 25.8, 25.1, 24.1, 24.0 ( $\text{CHMe}_2$ ), 4.9, 4.6, 3.5 ( $\text{SiMe}_2$ ).

IR (solid,  $\text{cm}^{-1}$ ): 2951 (m), 2860 (m), 1456 (m), 1433 (m), 1248 (s), 1380 (w), 1038 (m), 890 (s), 787 (s), 655 (w), 541 (w), 432 (w).

**Figure S9**  $^1\text{H}$  NMR spectrum (500 MHz,  $\text{C}_6\text{D}_6$ ) of **A**.

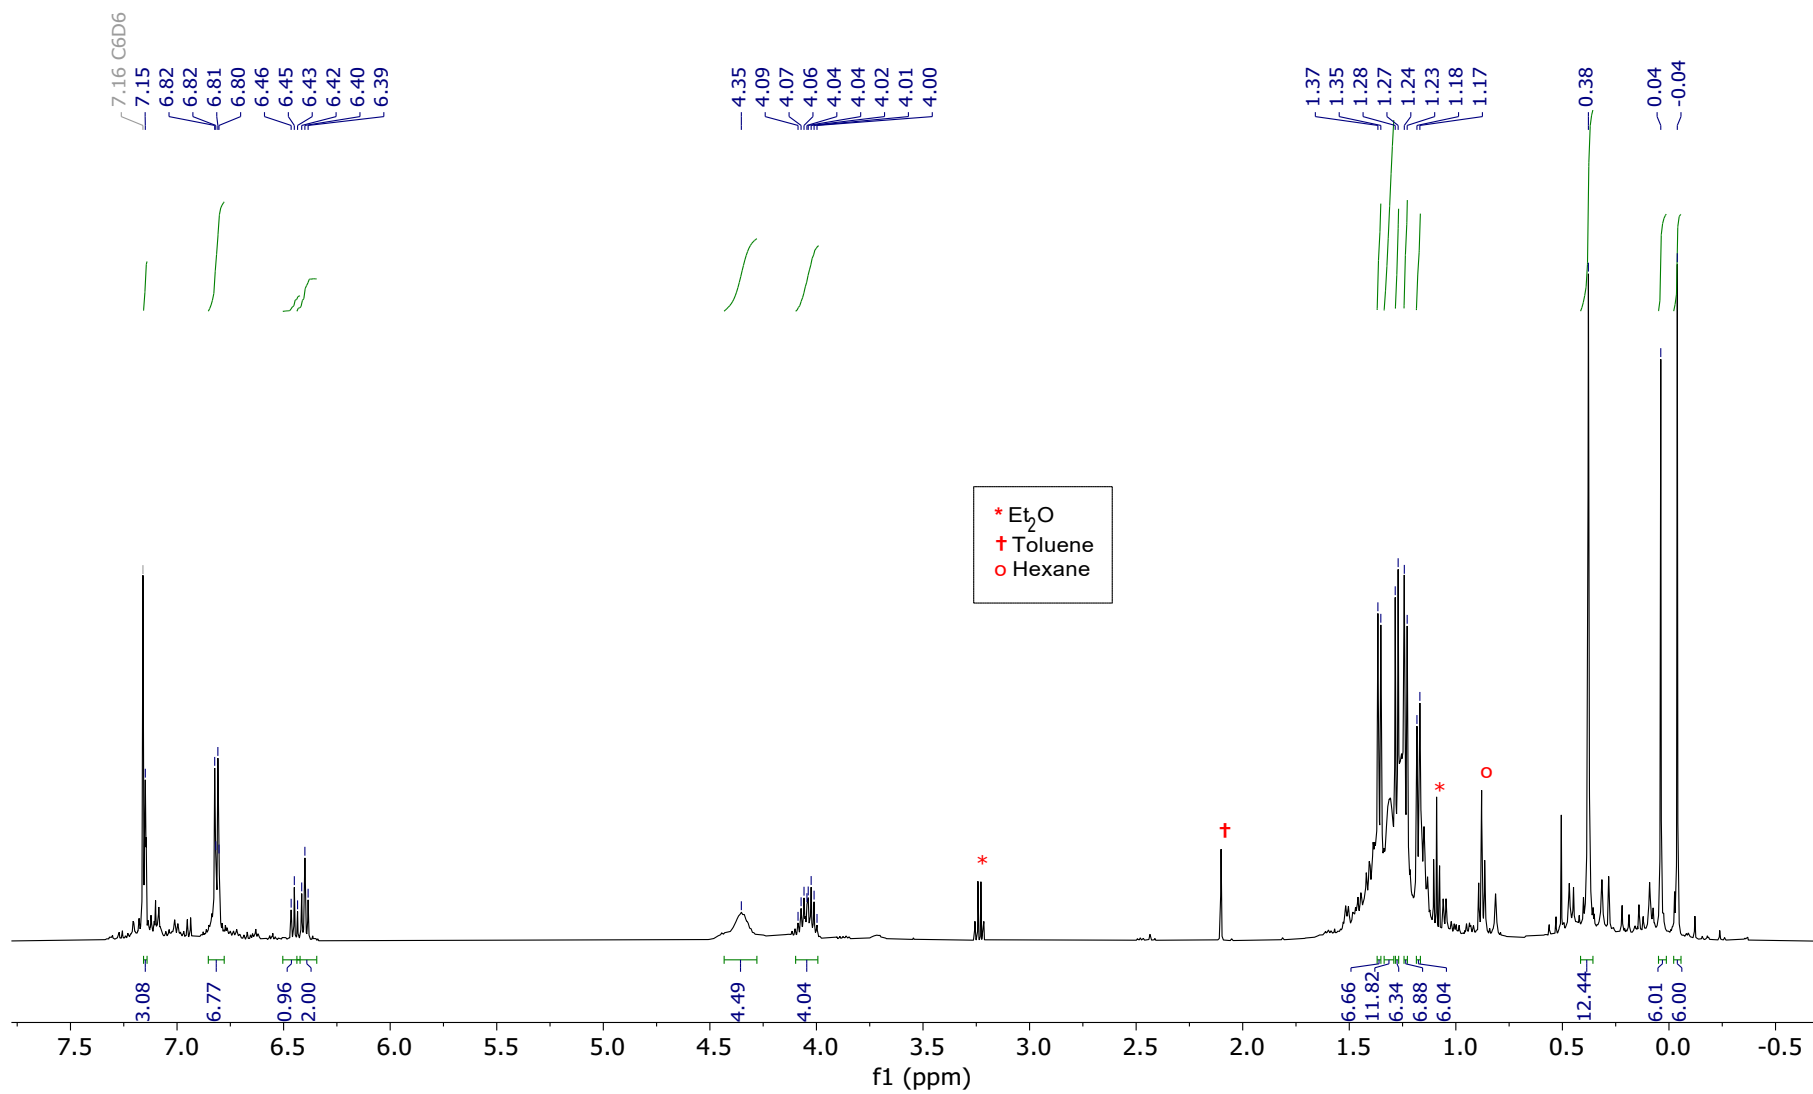

**Figure S10**  $^{13}\text{C}\{^1\text{H}\}$  NMR spectrum (126 MHz,  $\text{C}_6\text{D}_6$ ) of A.

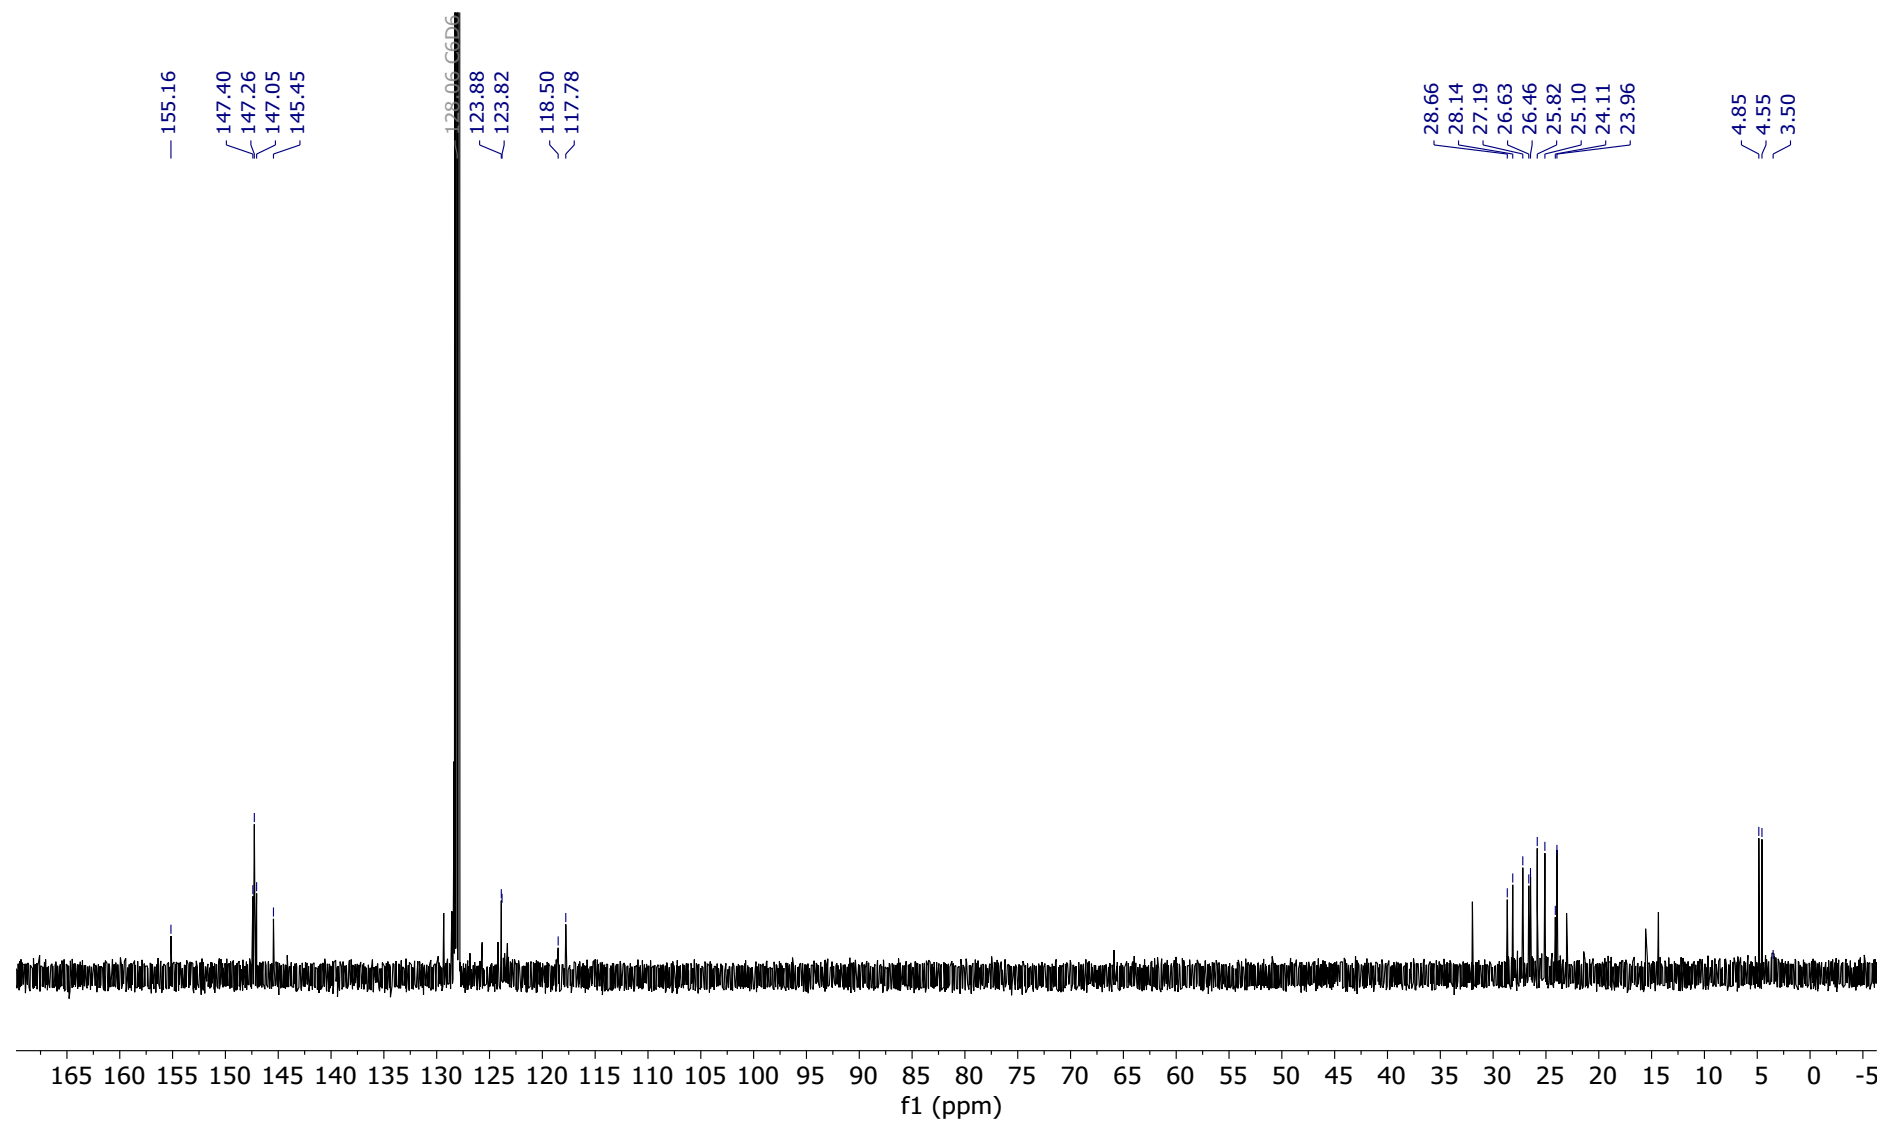

Figure S11 IR spectrum (solid sample) of A.

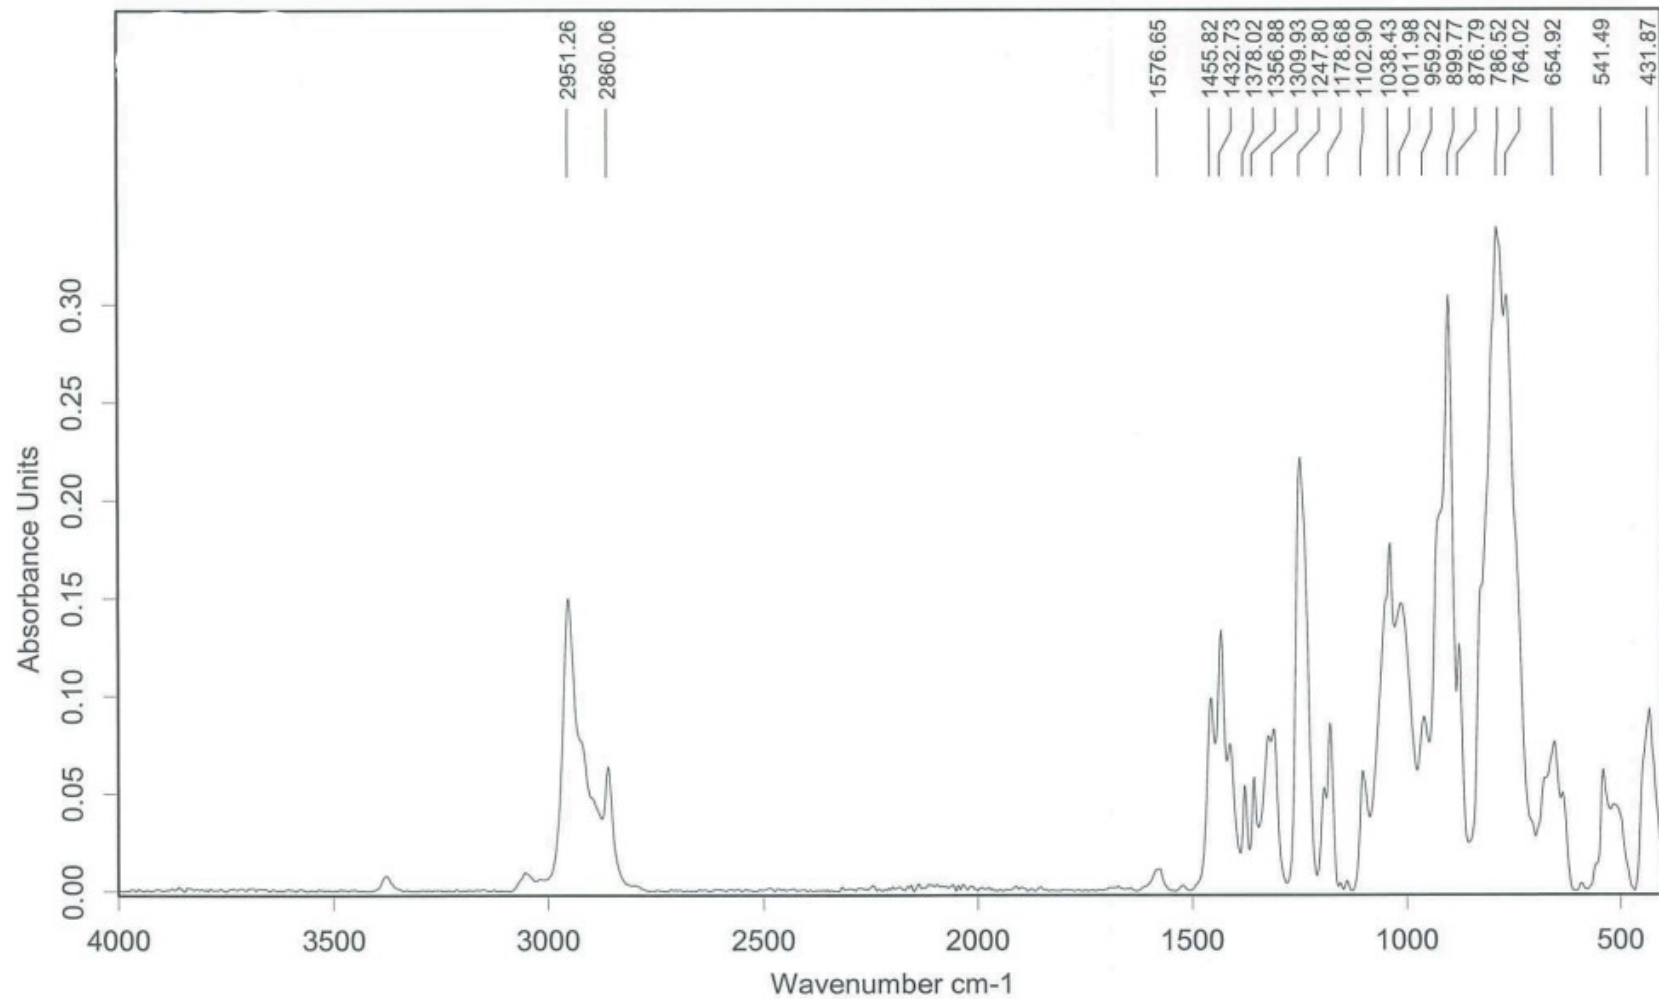



## Experimental Details for $\text{K}_2[(\text{NON})\text{Mg}\{\mu\text{-C}(\text{NiPr})_2\}\text{Mg}(\text{NNO})]$ **2**.

A solution of diisopropylcarbodiimide (10.0 mg, 0.08 mmol) in  $\text{C}_6\text{H}_6$  was added to a solution of **A** (91.5 mg, 0.08 mmol) in  $\text{C}_6\text{H}_6$  at room temperature. The reaction mixture gradually changed colour from bright yellow to colourless over 10 minutes. The solvent was reduced *in vacuo* and colourless crystals of **2** were obtained by slow evaporation at room temperature. Yield = 47.4 mg, 49%.

Accurate elemental analysis could not be obtained for this compound. Best result: Anal. Calcd. for  $\text{C}_{63}\text{H}_{106}\text{K}_2\text{Mg}_2\text{N}_6\text{O}_2\text{Si}_4$  (1218.728): C 62.09, H 8.77, N 6.91%; Found: 55.93, H 5.72, N 4.89%.

$^1\text{H}$  NMR (500 MHz,  $\text{C}_6\text{D}_6$ :THF- $\text{D}_8$  (~5:1)):  $\delta$  (ppm) 7.20 (m, 4H,  $\text{C}_6\text{H}_3$ ), 7.15 (m, 2H,  $\text{C}_6\text{H}_3$ ), 7.10 (m, 4H,  $\text{C}_6\text{H}_3$ ), 6.87 (t,  $J = 7.5$ , 1H,  $\text{C}_6\text{H}_3$ ), 6.75 (t,  $J = 7.5$ , 1H,  $\text{C}_6\text{H}_3$ ), 4.42 (m, 4H,  $\text{CHMe}_2$ ), 4.27 (sept,  $J = 6.9$ , 2H,  $\text{CHMe}_2$ ), 4.09 (sept,  $J = 6.9$ , 2H,  $\text{CHMe}_2$ ), 3.29 (sept,  $J = 6.5$ , 2H,  $\text{CHMe}_2$ ), 1.52 (d,  $J = 6.9$ , 6H,  $\text{CHMe}_2$ ), 1.45 (m, 24H,  $\text{CHMe}_2$ ), 1.42 (d,  $J = 6.9$ , 6H,  $\text{CHMe}_2$ ), 1.38 (d,  $J = 6.9$ , 12H,  $\text{CHMe}_2$ ), 1.27 (d,  $J = 6.9$ , 6H,  $\text{CHMe}_2$ ), 0.81 (d,  $J = 6.5$ , 6H,  $\text{CHMe}_2$ ), 0.26 (s, 6H,  $\text{SiMe}_2$ ), 0.24 (s, 6H,  $\text{SiMe}_2$ ), 0.17 (s, 6H,  $\text{SiMe}_2$ ), 0.17 (s, 6H,  $\text{SiMe}_2$ ).

$^{13}\text{C}\{^1\text{H}\}$  NMR (126 MHz,  $\text{C}_6\text{D}_6$ :THF- $\text{D}_8$  (~5:1)):  $\delta$  (ppm) 226.1 ( $\text{C}(\text{N}^i\text{Pr})_2$ ), 154.0, 150.8, 148.4, 148.2, 146.1, 145.6, 124.6, 124.6, 124.5, 124.2, 120.0, 118.9 ( $\text{C}_6\text{H}_3$ ), 58.3 ( $\text{NCHMe}_2$ ), 29.8 ( $\text{CHMe}_2$ ), 28.8, 28.3 ( $\text{CHMe}_2$ ), 27.6 ( $\text{CHMe}_2$ ), 27.3 ( $\text{CHMe}_2$ ), 27.2 ( $\text{CHMe}_2$ ), 26.9, 26.8, 26.7, 26.3, 26.2, 26.1, 25.40 ( $\text{CHMe}_2$ ), 5.5, 4.9, 4.7, 4.6 ( $\text{SiMe}_2$ ).

IR (solid,  $\text{cm}^{-1}$ ): 2953 (m), 2860 (w), 1655 (w), 1456 (m), 1431 (m), 1244 (s), 1176 (m), 1103 (w), 1038 (m), 897 (s), 797 (s), 764 (s), 654 (w), 542 (w), 449 (w).

Figure S12  $^1\text{H}$  NMR spectrum (500 MHz,  $\text{C}_6\text{D}_6$ :THF- $\text{D}_8$  (~5:1)) of **2**.

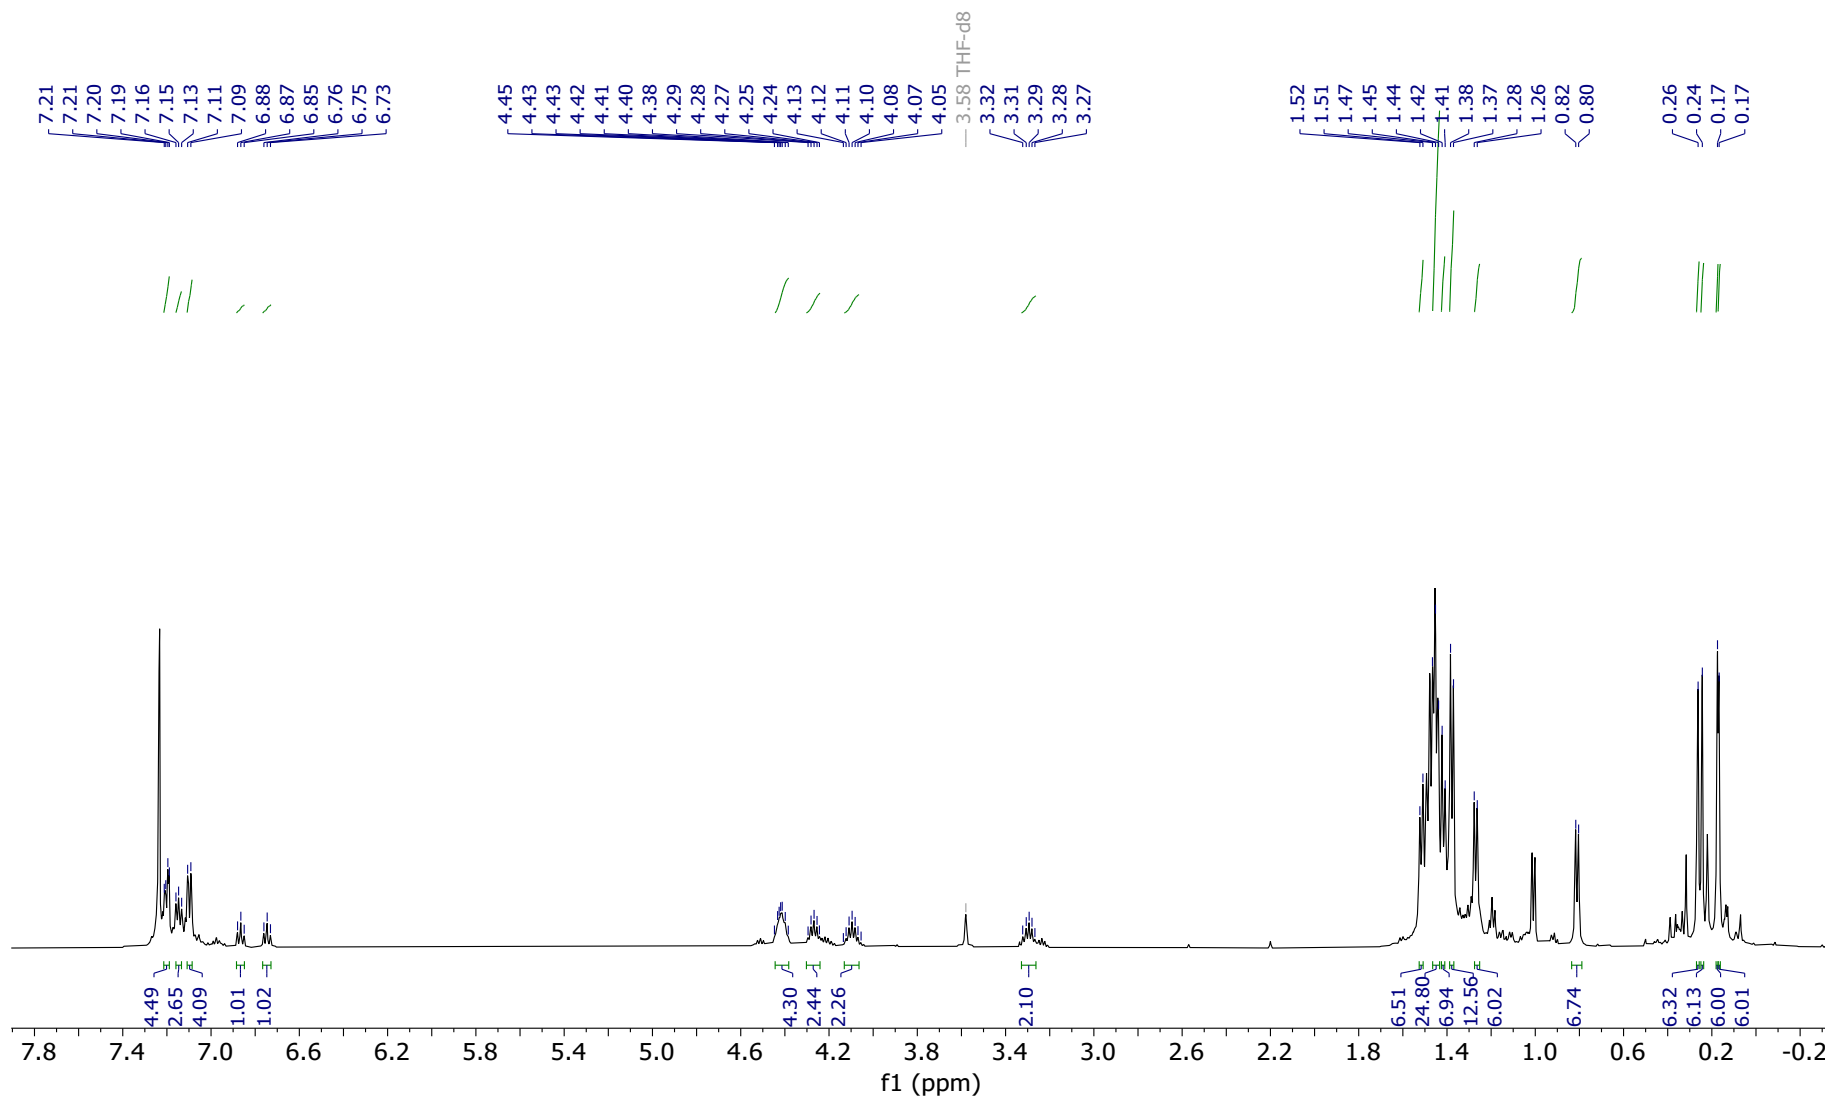

**Figure S13**  $^{13}\text{C}\{^1\text{H}\}$  NMR spectrum (126 MHz,  $\text{C}_6\text{D}_6$ :THF- $\text{D}_8$  (~5:1)) of **2**.

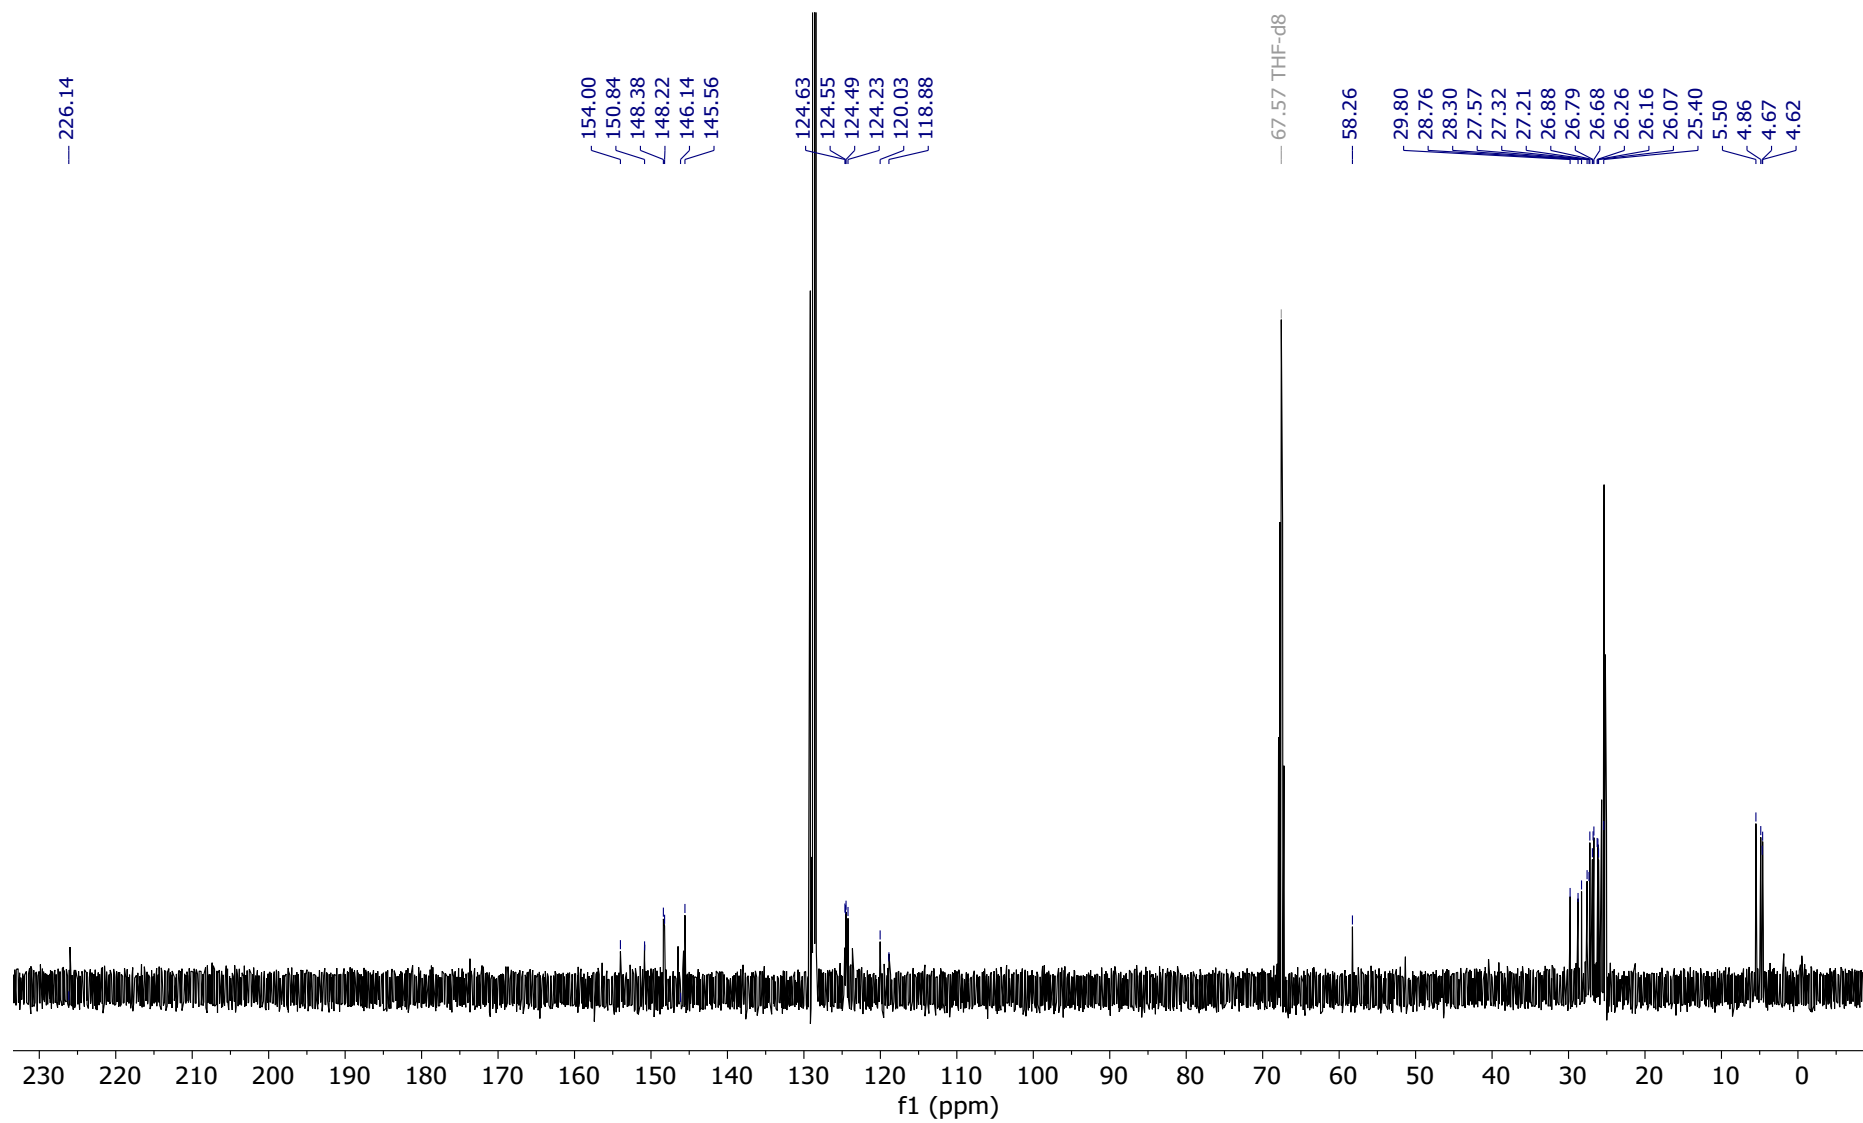

Figure S14 IR spectrum (solid sample) of 2.

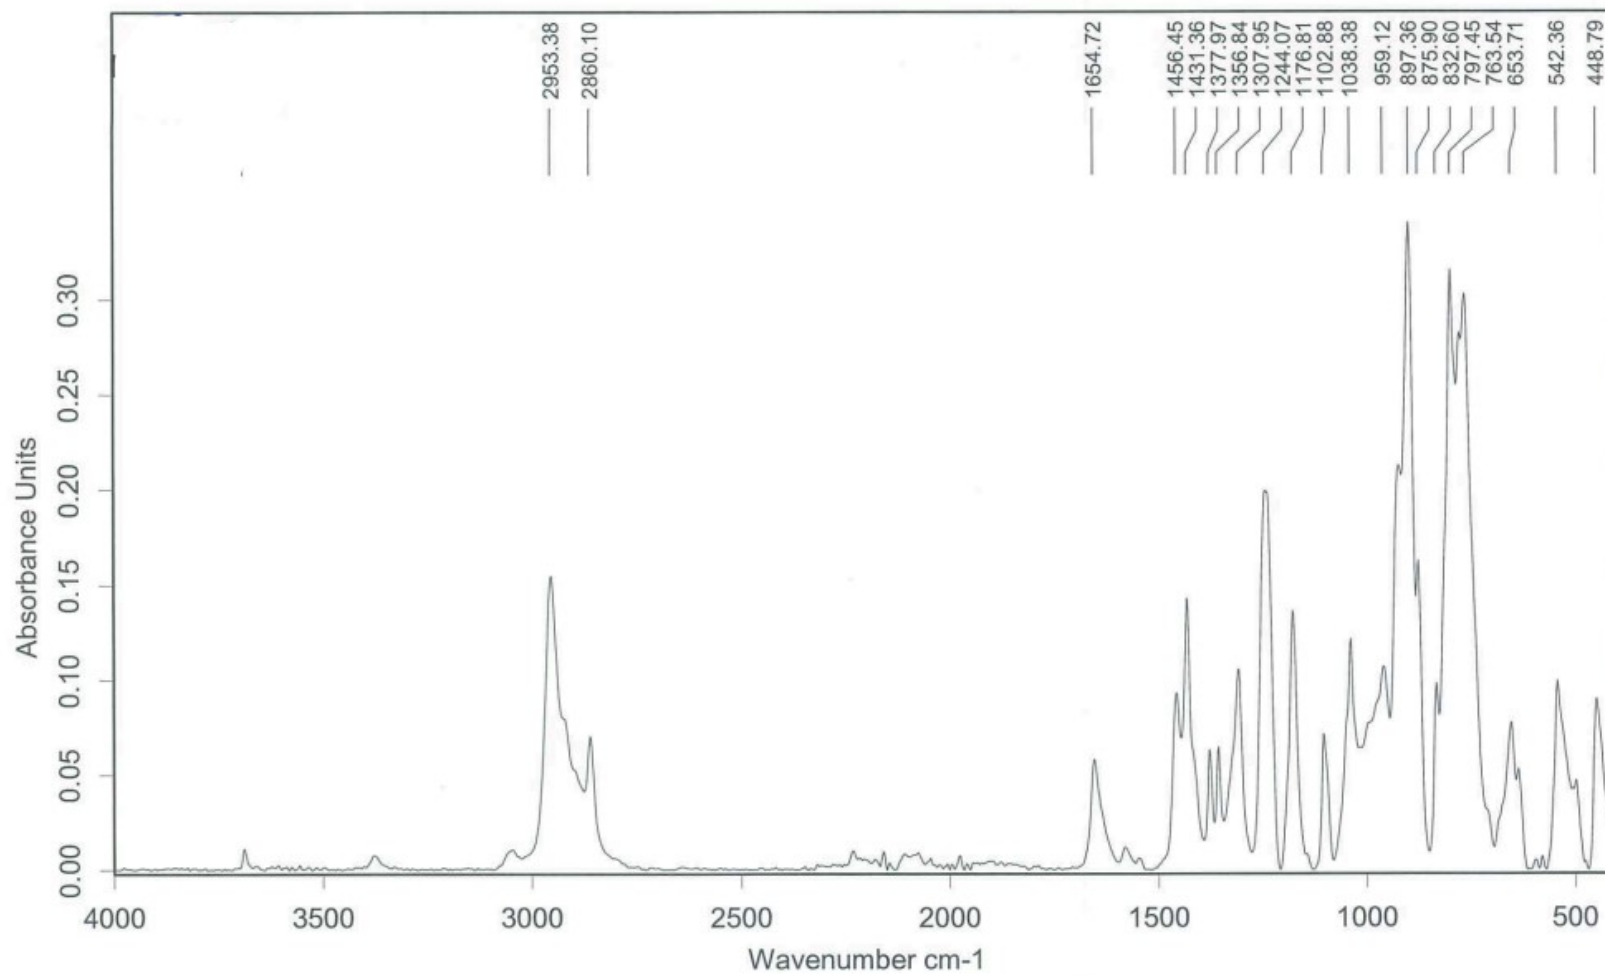

**Figure S15** ORTEP (ellipsoids 30%, H-atoms omitted), of the asymmetric unit of  $K_2[(NON)Mg\{\mu-C(NiPr)_2\}Mg(NNO)] \mathbf{2}$  (disordered atoms and benzene solvate molecules omitted).

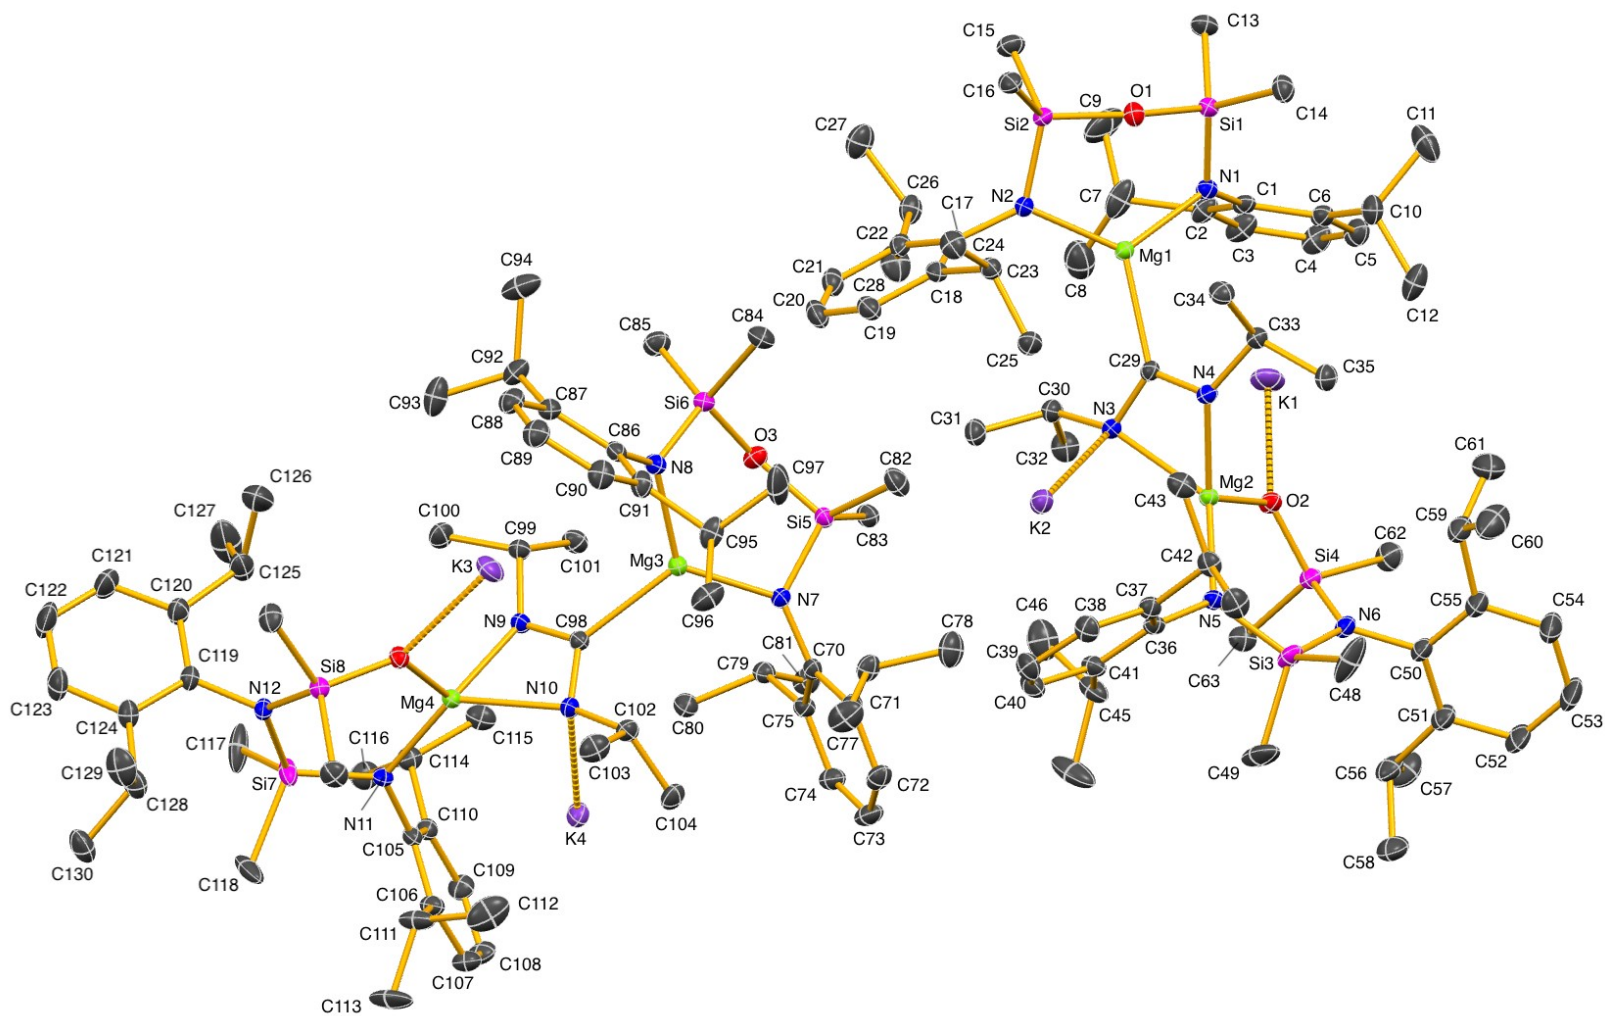

### Experimental Details for $\text{K}_2[\{\text{Mg}(\text{NON})(\text{Et}_2\text{O})\}_2(\mu\text{-O}_2\text{C}_2)] \cdot 3 \cdot \text{Et}_2\text{O}$ .

A solution of **A** (76.2 mg, 0.07 mmol) in  $\text{C}_6\text{D}_6$  was added to a J-Youngs NMR tube. The solution was degassed, and the reaction vessel was charge with CO gas (~0.5 bar). An immediate colour change from bright yellow to red-orange was observed. The reaction mixture was filtered, and solvent removed *in vacuo*. Crystals of  $3 \cdot \text{Et}_2\text{O}$  suitable for X-ray diffraction were obtained by slow evaporation from  $\text{Et}_2\text{O}$ . Yield = 12.2 mg, 13%.

Accurate elemental analysis could not be obtained for this compound. Best result: Anal. Calcd. for  $\text{C}_{66}\text{H}_{112}\text{K}_2\text{Mg}_2\text{N}_4\text{O}_6\text{Si}_4$  (1296.791): C 61.13, H 8.71, N 4.32%; Found: C 58.11, H 7.66, N 4.35%.

$^1\text{H}$  NMR (500 MHz,  $\text{C}_6\text{H}_6$ ):  $\delta$  (ppm) 6.92 (d,  $J = 7.4$ , 8H,  $\text{C}_6\text{H}_3$ ), 6.70 (t,  $J = 7.4$ , 4H,  $\text{C}_6\text{H}_3$ ), 4.15 (m, 8H,  $\text{CHMe}_2$ ), 3.28 (q,  $J = 6.9$ , 8H,  $\text{Et}_2\text{O}$ ), 1.30 (d,  $J = 6.9$ , 24H,  $\text{CHMe}_2$ ), 1.12 (t,  $J = 6.9$ , 12H,  $\text{Et}_2\text{O}$ ), 1.06 (d,  $J = 6.9$ , 24H,  $\text{CHMe}_2$ ), 0.35 (s, 24H,  $\text{SiMe}_2$ ).

$^{13}\text{C}\{^1\text{H}\}$  NMR (126 MHz,  $\text{C}_6\text{H}_6$ ):  $\delta$  (ppm) 152.6, 145.9, 122.6, 118.8 ( $\text{C}_6\text{H}_3$ ), 76.6 ( $\text{OC}\equiv\text{CO}$ ), 65.9 ( $\text{OCH}_2\text{CH}_3$ ), 27.0 ( $\text{CHMe}_2$ ), 25.7 24.1 ( $\text{CHMe}_2$ ) 15.5 ( $\text{OCH}_2\text{CH}_3$ ), 3.9 ( $\text{SiMe}_2$ ).

IR (solid,  $\text{cm}^{-1}$ ): 2958 (m), 2925 (m), 2866 (m), 1580 (w), 1420 (m), 1326 (m), 1250 (s), 1041 (m), 905 (s), 774 (s), 497 (w).

Figure S16  $^1\text{H}$  NMR spectrum (500MHz,  $\text{C}_6\text{D}_6$ ) of  $\mathbf{3}\cdot\text{Et}_2\text{O}$ .

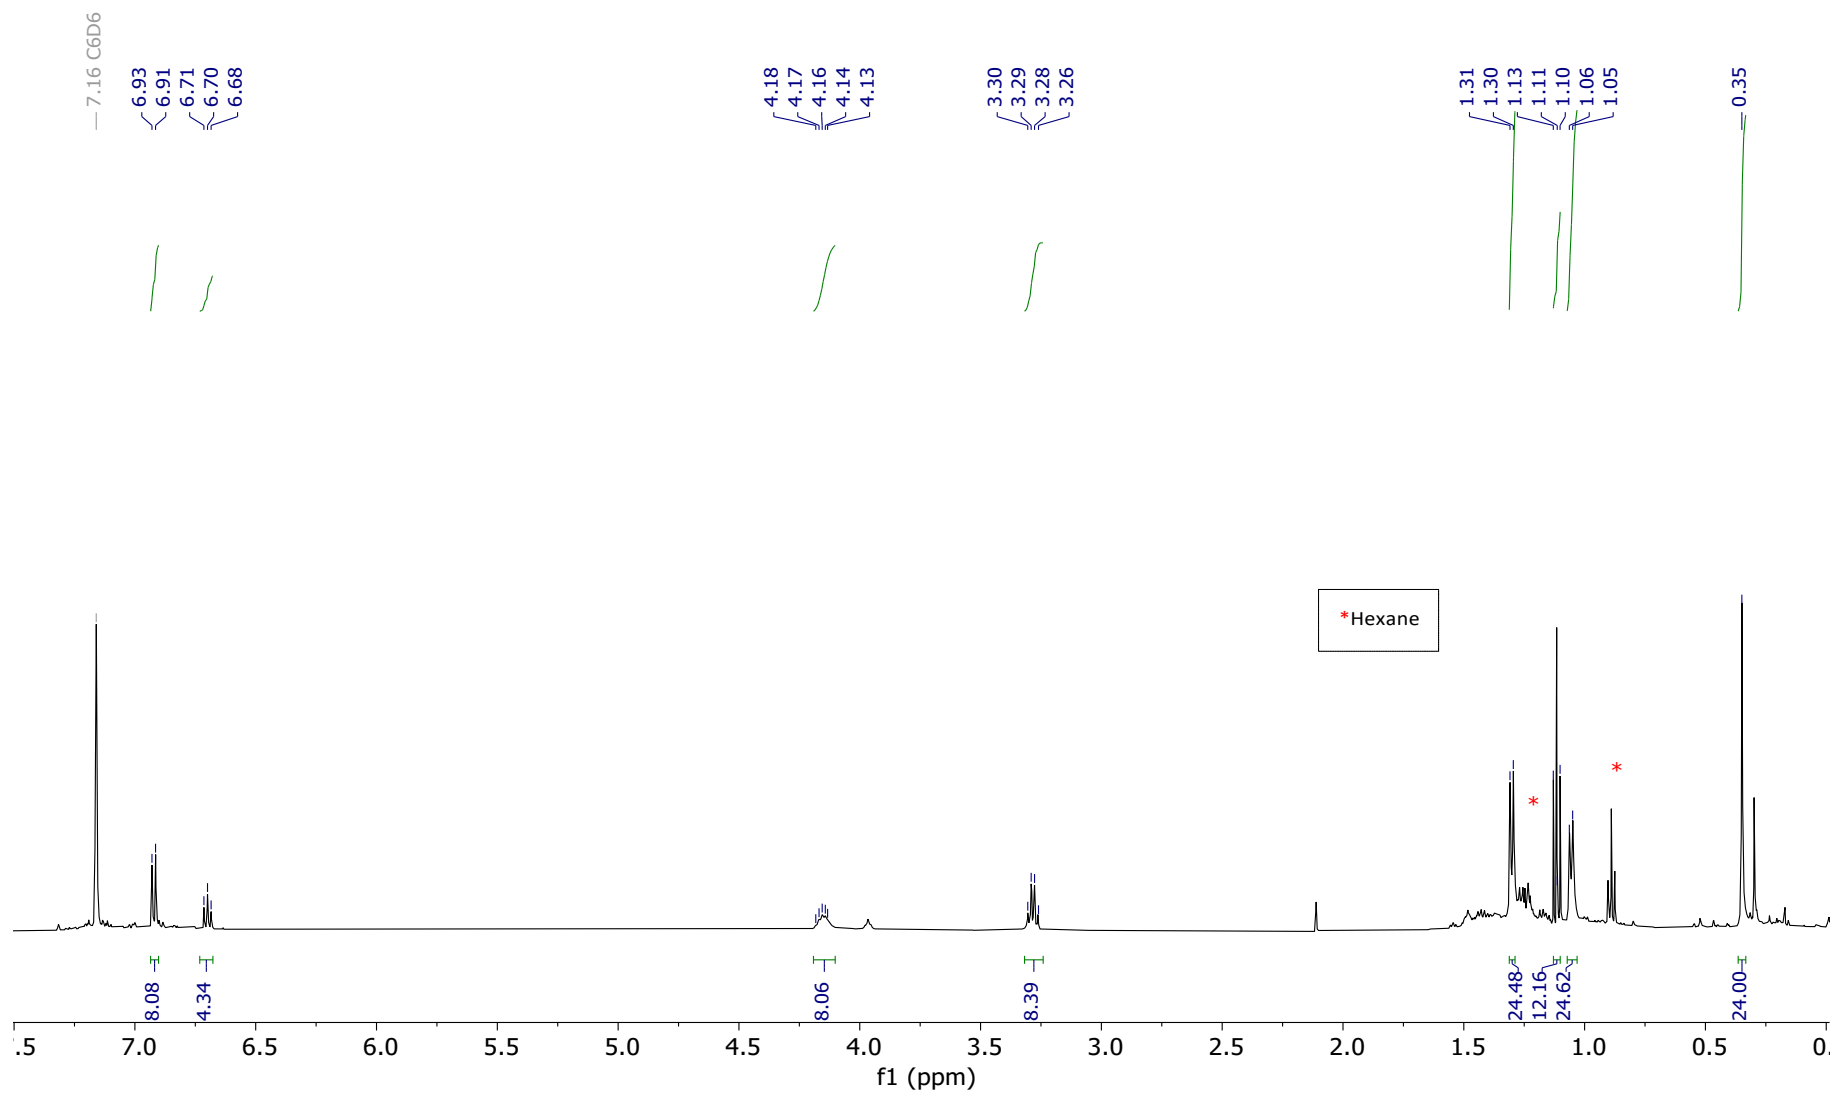

Figure S17  $^{13}\text{C}\{^1\text{H}\}$  NMR spectrum (126 MHz,  $\text{C}_6\text{D}_6$ ) of **3**· $\text{Et}_2\text{O}$ .

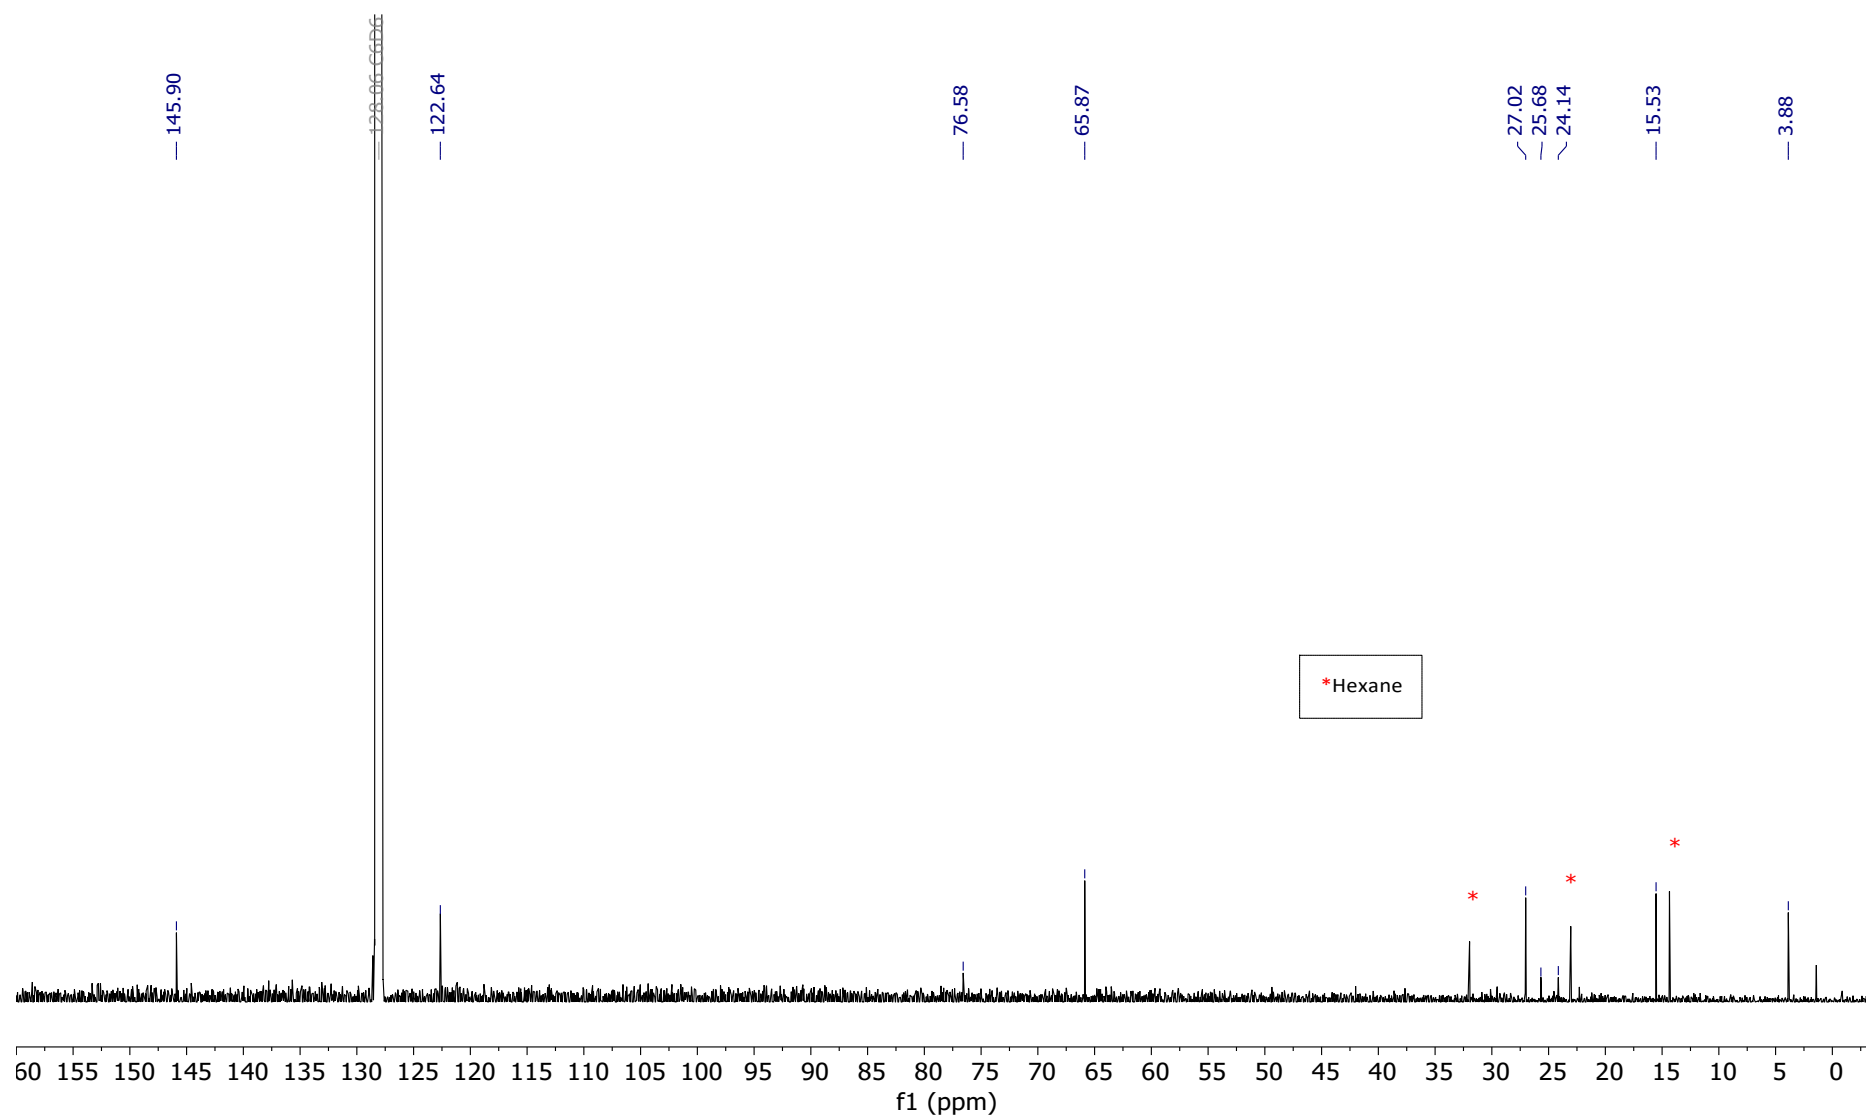



Figure S18 IR spectrum (solid sample) of 3·Et<sub>2</sub>O.

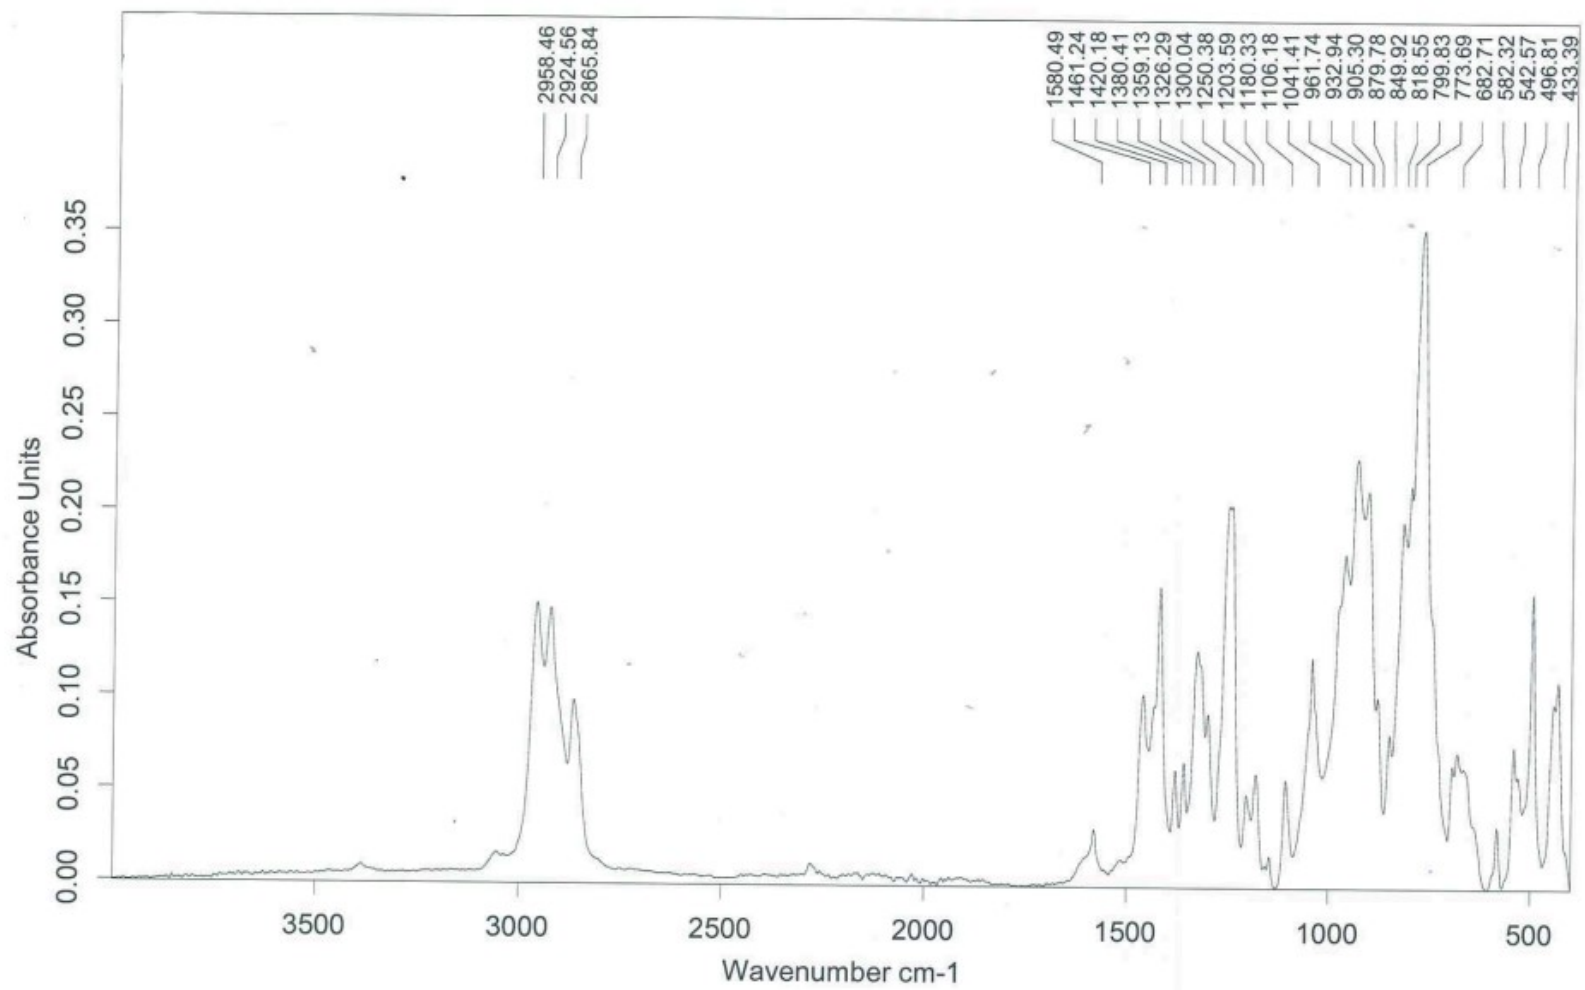

**Figure S19** ORTEP (ellipsoids 30%, H-atoms omitted), of the asymmetric unit of  $K_2[\{Mg(NON)(Et_2O)\}_2(\mu-O_2C_2)] \cdot 3 \cdot Et_2O$  (disordered atoms omitted).

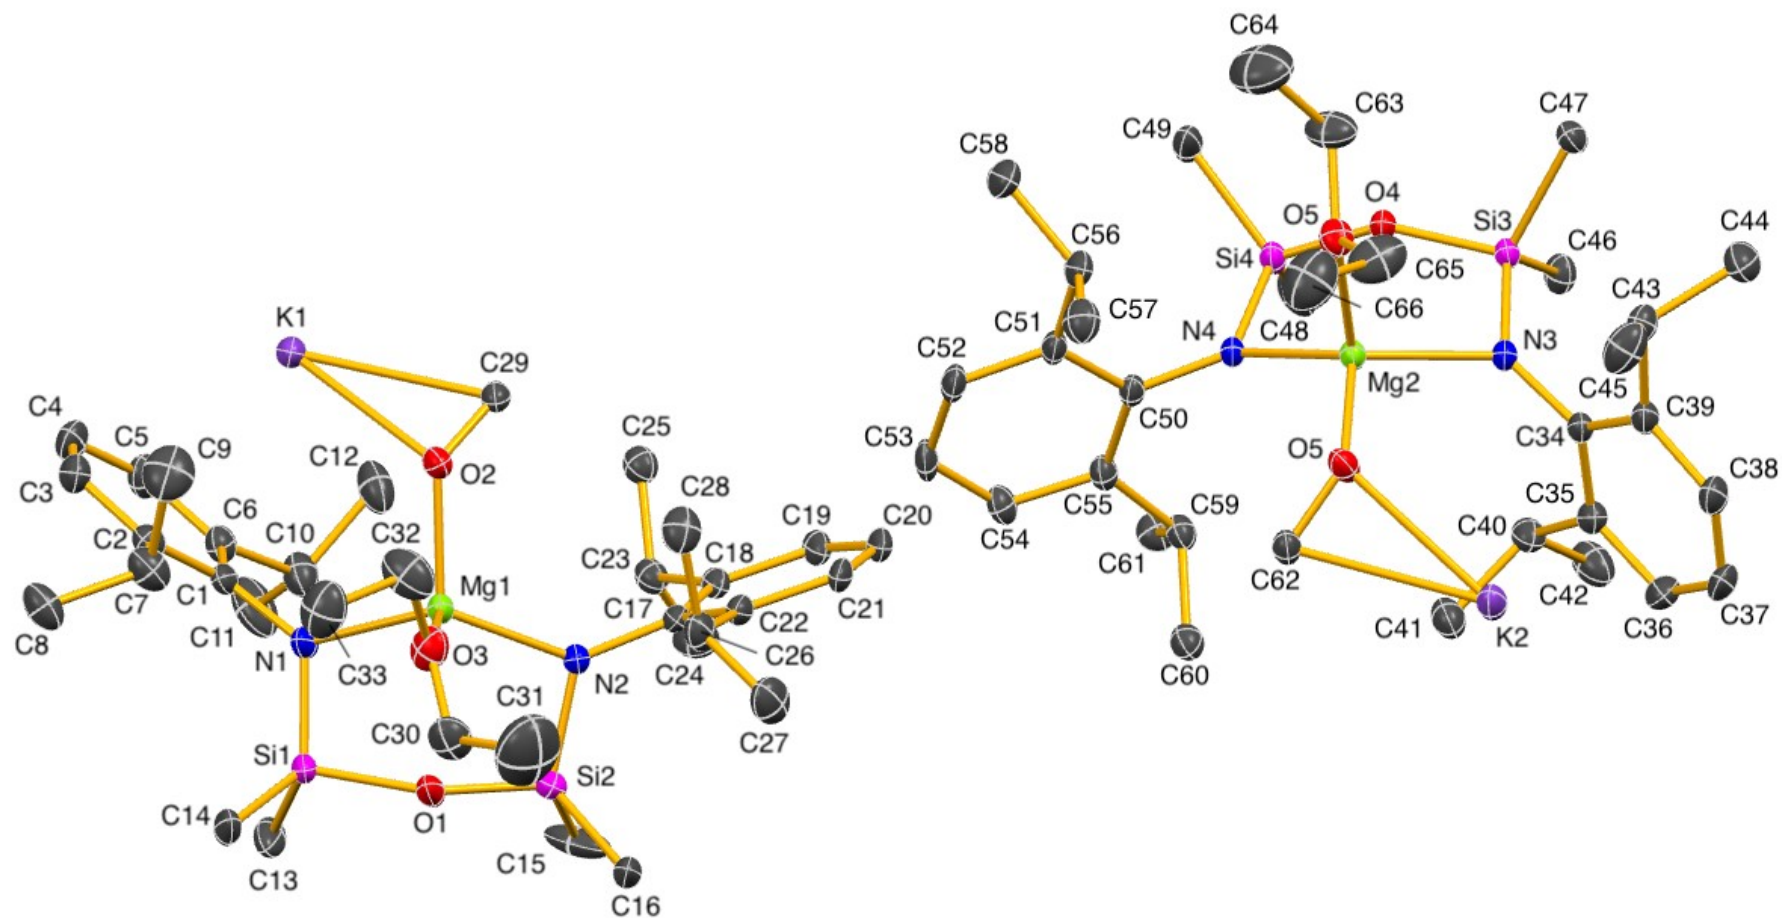

### Experimental Details for $[\text{K}(\text{THF})_2]_2[\{\text{Mg}(\text{NNO})\}_2] \cdot 4 \cdot \text{THF}$ .

A white suspension of  $[\text{Mg}(\text{NON})]_2$  (175.0 mg, 0.17 mmol) in diethyl ether was added to a suspension of  $\text{KC}_8$  (137.9 mg, 1.02 mmol) in  $\text{Et}_2\text{O}$  while stirring at room temperature. The reaction mixture was stirred for *ca.* 2 hrs. The reaction mixture was allowed to settle and filtered through celite to afford a bright yellow solution. The solvent was removed *in vacuo* and the resulting yellow solid **A** was isolated. Yield = 108.6 mg. The yellow solid **A** was redissolved in a minimum volume of benzene/THF (~1:1) and yellow block crystals of  $4 \cdot \text{THF}$  were obtained by slow evaporation at room temperature. Yield = 50.2 mg, 37%.

M.P.: >260 °C.

Accurate elemental analysis could not be obtained for this compound. Best result:

Anal. Calcd. for  $\text{C}_{72}\text{H}_{124}\text{K}_2\text{Mg}_2\text{N}_4\text{O}_6\text{Si}_4$  (1380.953) = 4 × THF: C 62.62, H 9.05, N 4.06%;

Anal. Calcd. for  $\text{C}_{60}\text{H}_{100}\text{K}_2\text{Mg}_2\text{N}_4\text{O}_3\text{Si}_4$  (1164.63) = 1 × THF: C 61.88, H 8.66, N 4.81%.

Found: C 60.63, H 8.55, N 4.65%. Results may indicate partial loss of THF during sample preparation and analysis.

$^1\text{H}$  NMR (500 MHz,  $\text{THF-D}_8$ ):  $\delta$  (ppm) 6.97 (m, 8H,  $\text{C}_6\text{H}_3$ ), 6.89 (t,  $J = 7.5$ , 2H,  $\text{C}_6\text{H}_3$ ), 6.67 (t,  $J = 7.5$ , 2H,  $\text{C}_6\text{H}_3$ ), 4.12 (sept,  $J = 6.9$ , 4H,  $\text{CHMe}_2$ ), 3.97 (sept,  $J = 6.9$ , 4H,  $\text{CHMe}_2$ ), 3.62 (m, 12H, THF-*H*), 1.78 (m, 12H, THF-*H*), 1.23 (m, 24H,  $\text{CHMe}_2$ ), 1.16 (d,  $J = 6.9$ , 24H,  $\text{CHMe}_2$ ), -0.19 (s, 12H,  $\text{SiMe}_2$ ), -0.36 (s, 12H,  $\text{SiMe}_2$ ).

$^{13}\text{C}\{^1\text{H}\}$  NMR (126 MHz,  $\text{THF-D}_8$ )  $\delta$  147.6, 123.7, 123.3, 118.0 ( $\text{C}_6\text{H}_3$ ), 68.3 (THF-*H*), 29.0 ( $\text{CHMe}_2$ ), 28.6, 27.1 ( $\text{CHMe}_2$ ), 26.4 (THF-*H*), 26.4, 26.2, 23.6 ( $\text{CHMe}_2$ ), 4.6, 4.0 ( $\text{SiMe}_2$ ).

IR (solid,  $\text{cm}^{-1}$ ): 3038 (m), 2867 (m), 1579 (w), 1460 (m), 1380 (w), 1313 (s), 1041 (m), 961 (s), 798 (s), 675 (s), 583 (w), 442 (w).

Figure S20  $^1\text{H}$  NMR spectrum (500MHz, THF- $\text{D}_8$ ) of 4·THF.

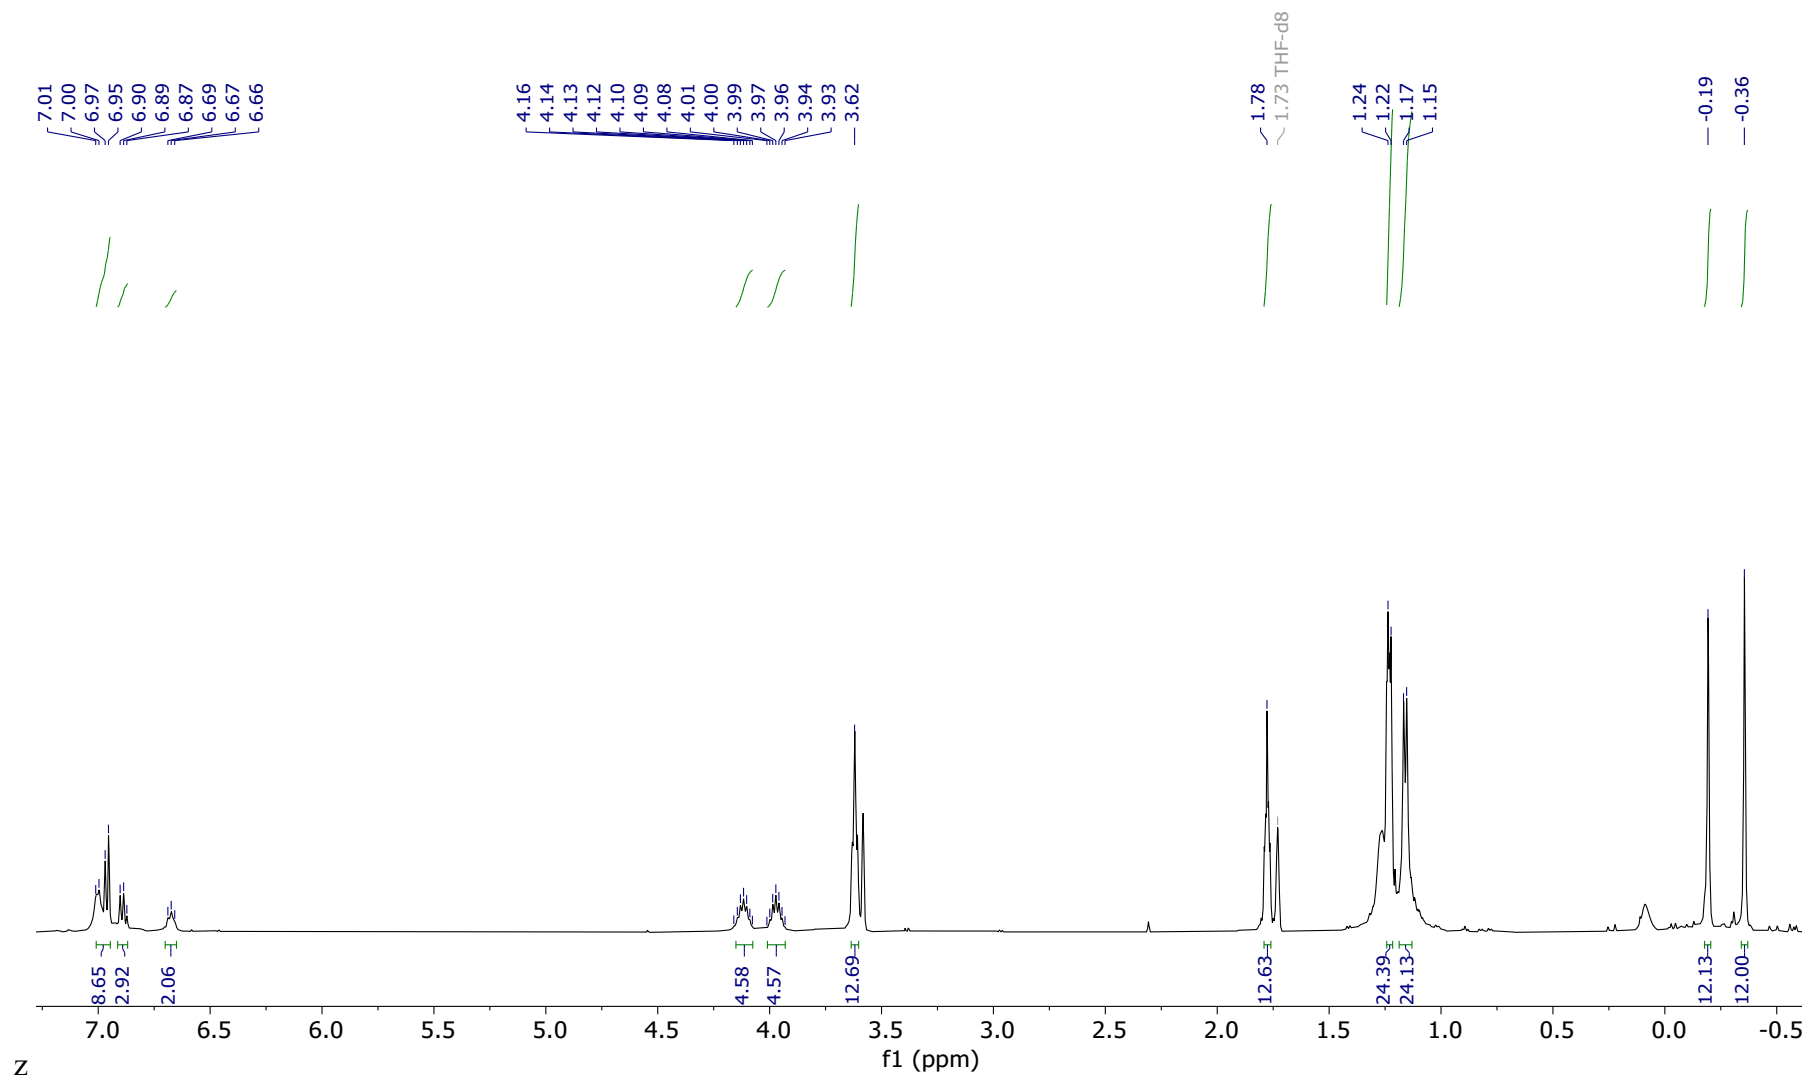

**Figure S21**  $^{13}\text{C}$  NMR spectrum (126 MHz, THF- $\text{D}_8$ ) of **4**·THF.

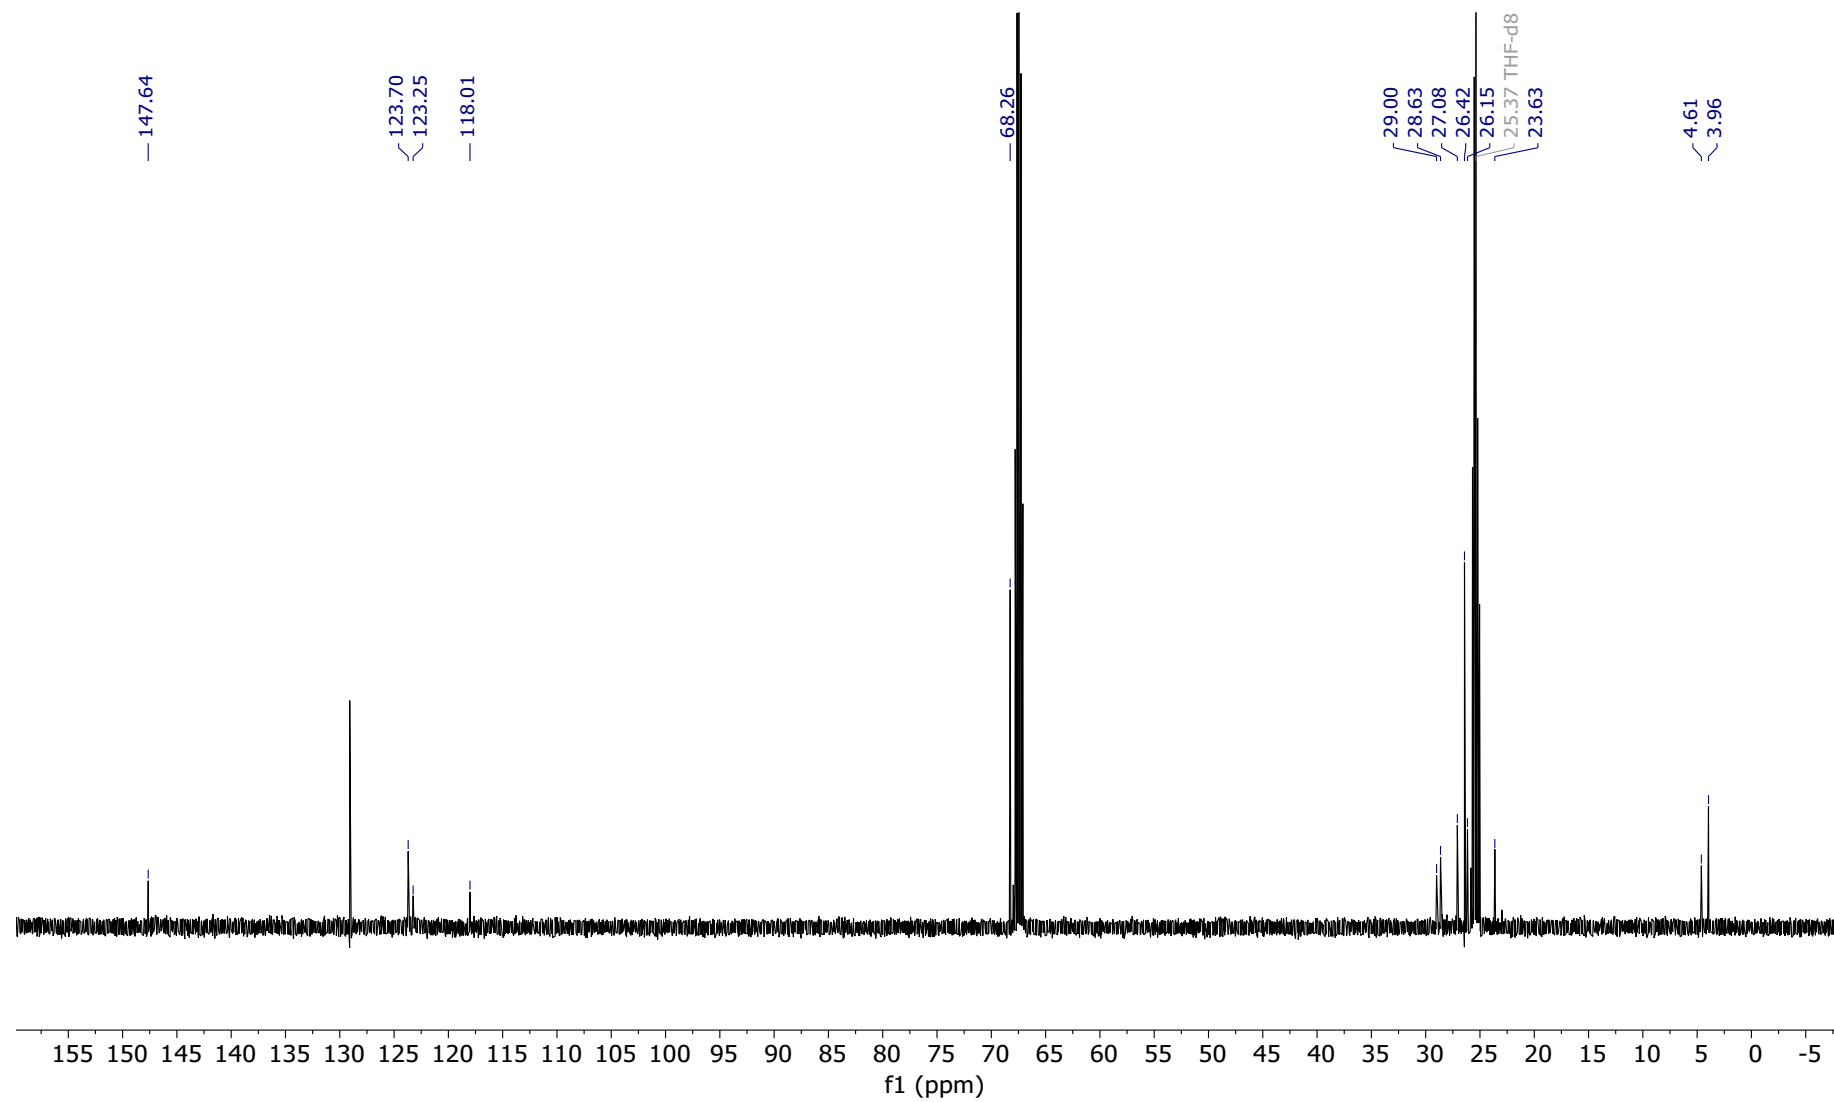

Figure S22 IR spectrum (solid sample) of 4·THF.

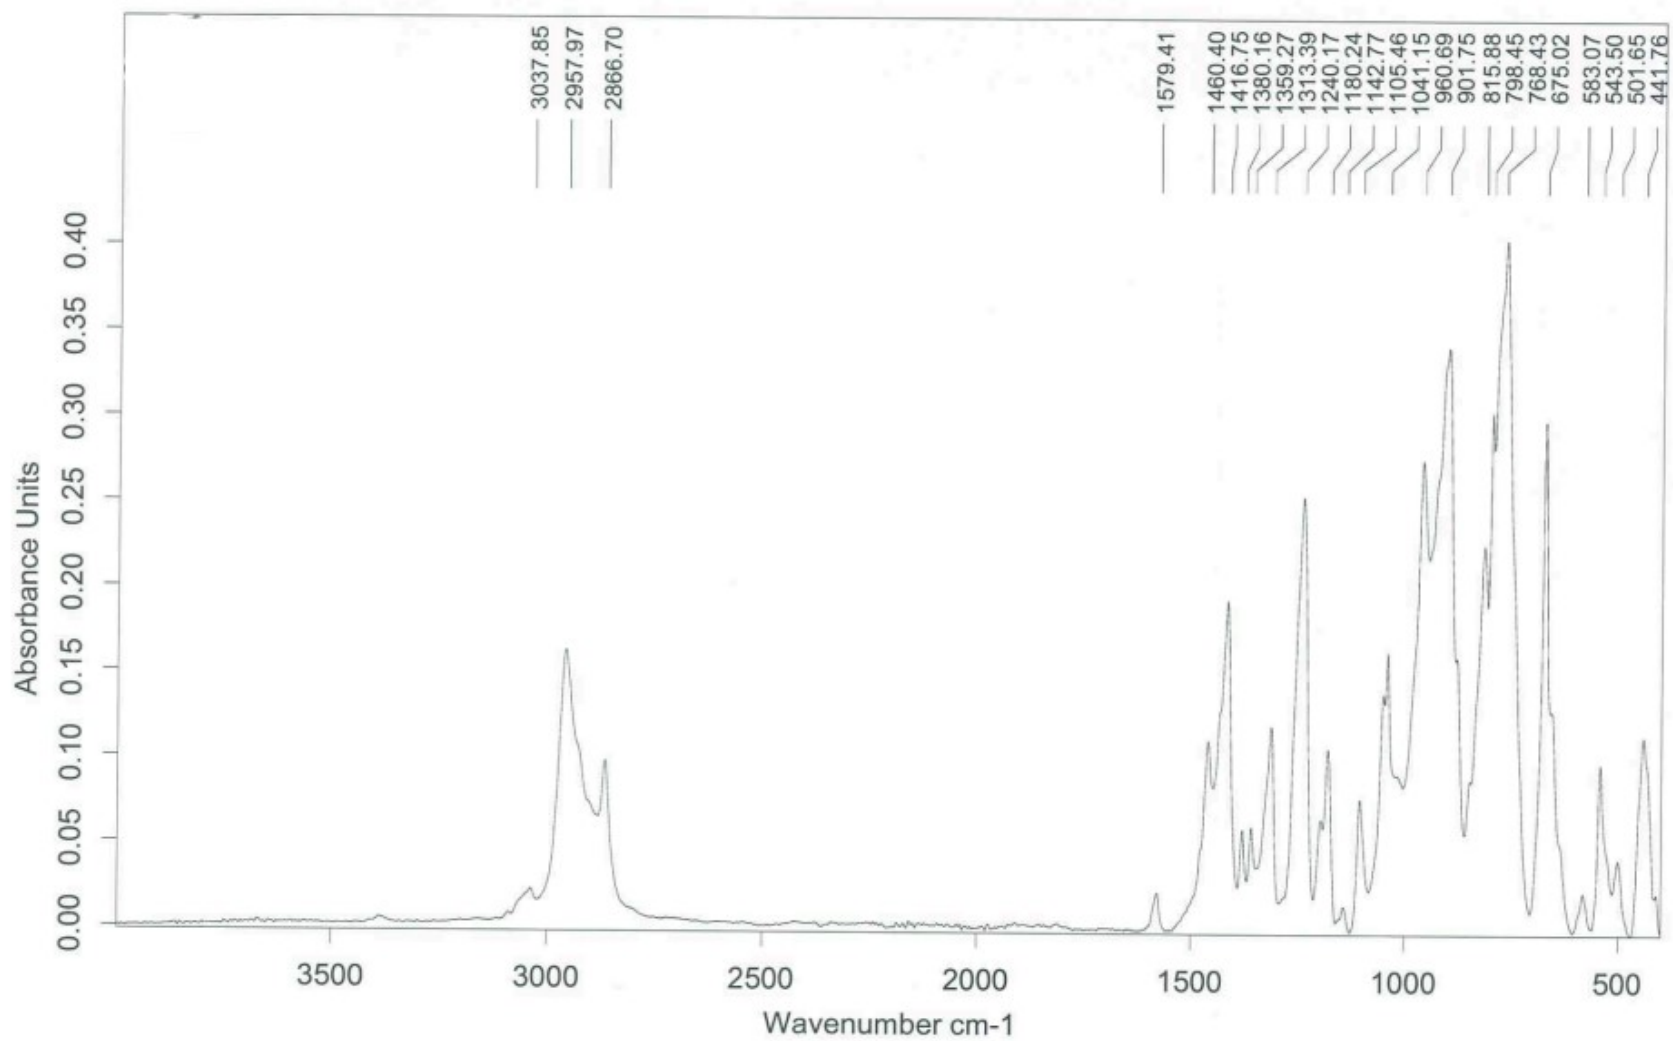

**Figure S23** ORTEP (ellipsoids 30%, H-atoms omitted), of the asymmetric unit of  $[K(THF)_2]_2[\{Mg(NNO)\}_2] \cdot 4 \cdot THF$  (disordered atoms omitted).

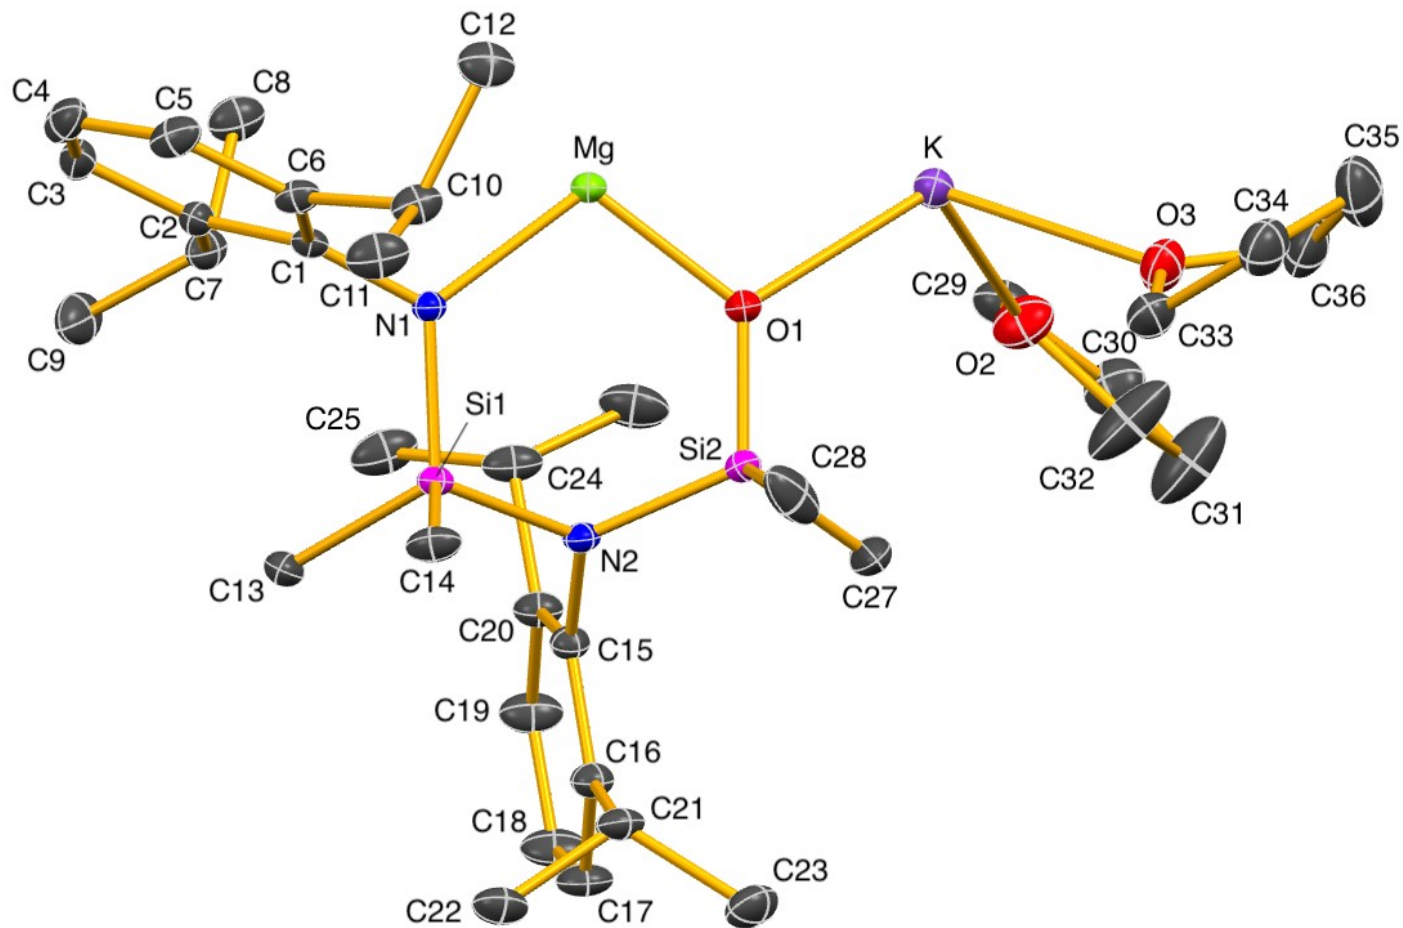

**Figure S24** Residual electron density ( $0.35 \text{ e}\text{\AA}^{-3}$ ) for  $4 \cdot \text{THF}$  (inset = core of the molecule)

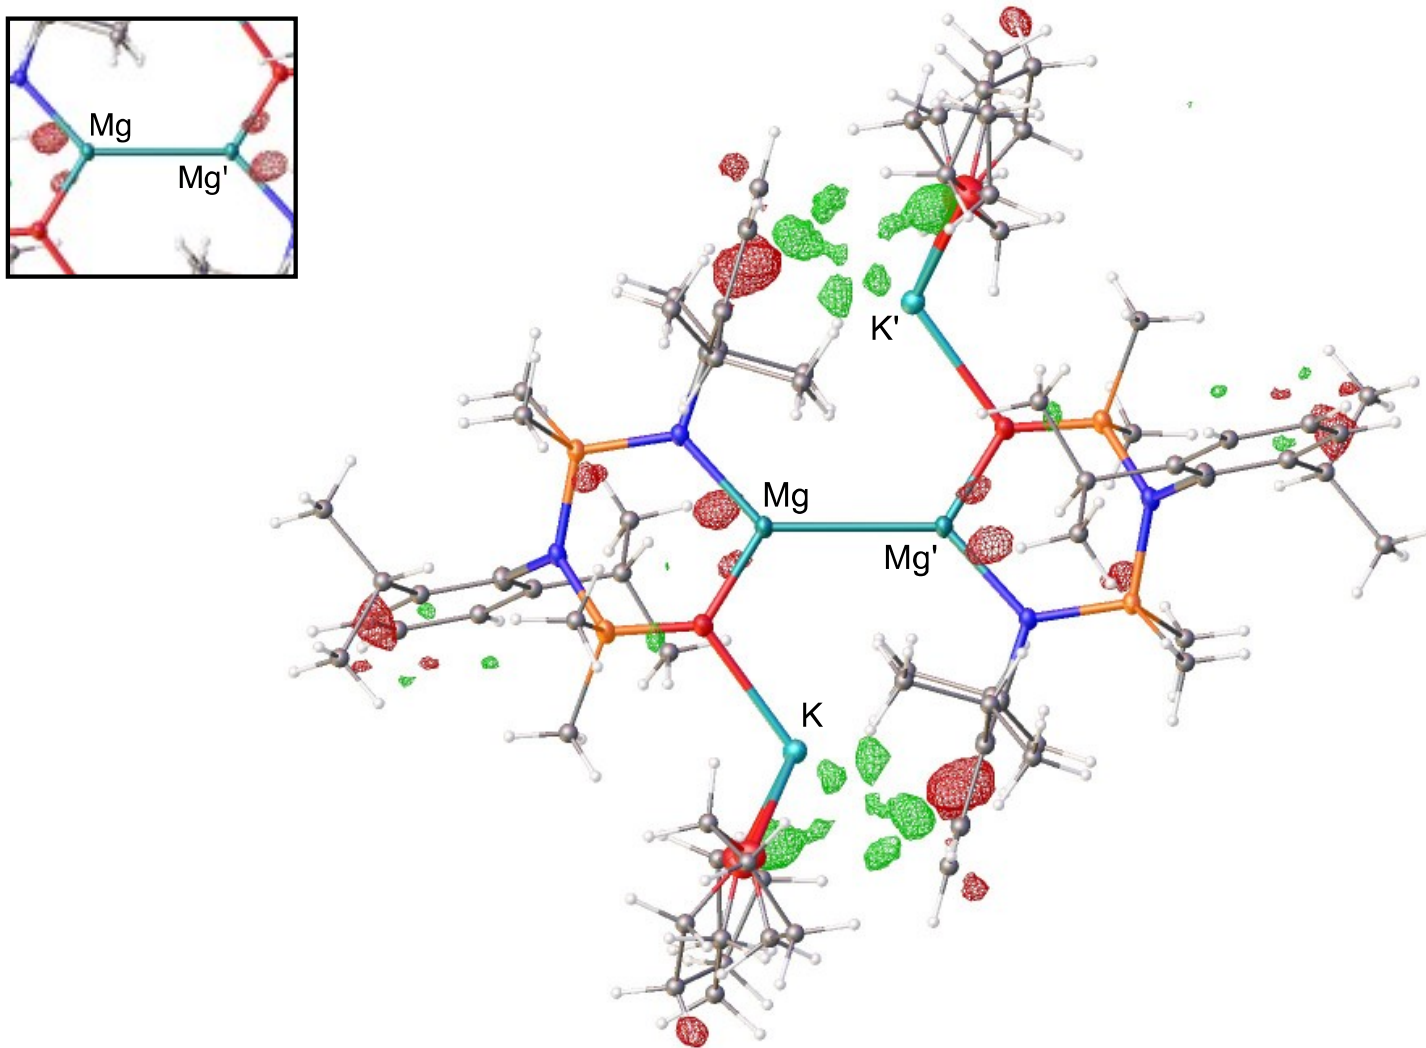



## Crystallographic Details

Crystals were covered in inert oil and suitable single crystals were selected under a microscope and mounted on an Agilent SuperNova diffractometer fitted with an EOS S2 detector. Data were collected at 120 K (unless indicated otherwise) using focused microsource Cu K $\alpha$  radiation at 1.54184 Å. Intensities were corrected for Lorentz and polarisation effects and for absorption using multi-scan methods.<sup>S3</sup> Space groups were determined from systematic absences and checked for higher symmetry. All structures were solved using direct methods with SHELXS,<sup>S4</sup> refined on  $F^2$  using all data by full matrix least-squares procedures with SHELXL-97<sup>S5</sup> within WinGX.<sup>S6</sup> programs. Non-hydrogen atoms were refined with anisotropic displacement parameters. Hydrogen atoms were placed in calculated positions or manually assigned from residual electron density where appropriate, unless otherwise stated. The isotropic displacement parameters are 1.2 or 1.5 times the isotropic equivalent of their carrier atoms.

### *Additional Information:*

*Compound 1:* The molecule is located on an inversion centre, generating [Mg(NON)]<sub>2</sub>.

*Compound 2:* Data was collected at 150 K (due to equipment limitations). There are two essentially identical molecules in the asymmetric unit, joined via an interaction between an SiMe group and a K-cation. The two benzene solvate molecule are located close to K-atoms and may be weakly interacting. There is disorder in 3  $\times$  *i*Pr substituents, 1  $\times$  SiMe<sub>2</sub> groups 1  $\times$  benzene solvate. Each was modelled over two positions, with the disordered C<sub>6</sub>-rings constrained with the AFIX 66 command. Where a suitable model could not found, the lower occupancy sites were refined with isotropic carbon atoms.

*Compound 3·Et<sub>2</sub>O:* There are two essentially identical ½ molecules in the asymmetric unit, each located on an inversion centre located at the midpoint of the C $\equiv$ C bond. One of the ½ molecules has disorder in 1  $\times$  *i*Pr substituent, both OEt groups and the SiMe<sub>2</sub> groups. Each was modelled over two positions. Where suitable model could not found, the lower occupancy sites were refined with isotropic carbon atoms.

*Compound 4·THF:* The data solves as a ½ molecule located with an inversion centre at the midpoint of the Mg–Mg bond. One of the coordinated THF molecules is disordered and was modelled over two positions.

**Table S1** Crystal structure and refinement data for **1** and **2**

|                                              | <b>1</b>                                                                                      | <b>2</b>                                                                                                        |
|----------------------------------------------|-----------------------------------------------------------------------------------------------|-----------------------------------------------------------------------------------------------------------------|
| Empirical formula                            | C <sub>56</sub> H <sub>92</sub> Mg <sub>2</sub> N <sub>4</sub> O <sub>2</sub> Si <sub>4</sub> | C <sub>138</sub> H <sub>224</sub> K <sub>4</sub> Mg <sub>4</sub> N <sub>12</sub> O <sub>4</sub> Si <sub>8</sub> |
| CCDC Number                                  | 2357068                                                                                       | 2357069                                                                                                         |
| $M_r$                                        | 1014.32                                                                                       | 2593.64                                                                                                         |
| $T$ [K]                                      | 120.0(2)                                                                                      | 150.0(1)                                                                                                        |
| Crystal size [mm]                            | 0.21 × 0.16 × 0.09                                                                            | 0.21 × 0.15 × 0.10                                                                                              |
| Crystal system                               | Monoclinic                                                                                    | Triclinic                                                                                                       |
| Space group                                  | P2 <sub>1</sub> /n (alternative No.14)                                                        | P $\bar{1}$ (No.2)                                                                                              |
| $a$ [Å]                                      | 15.6370(2)                                                                                    | 16.3939(2)                                                                                                      |
| $b$ [Å]                                      | 11.51056(14)                                                                                  | 21.2191(3)                                                                                                      |
| $c$ [Å]                                      | 17.4414(2)                                                                                    | 21.8811(3)                                                                                                      |
| $\alpha$ [°]                                 | 90                                                                                            | 81.3508(13)                                                                                                     |
| $\beta$ [°]                                  | 108.6621(15)                                                                                  | 89.9089(12)                                                                                                     |
| $\gamma$ [°]                                 | 90                                                                                            | 88.1901(13)                                                                                                     |
| $V$ [Å <sup>3</sup> ]                        | 2974.22(7)                                                                                    | 7521.29(19)                                                                                                     |
| $Z$                                          | 2                                                                                             | 2                                                                                                               |
| $D_{\text{calc}}$ [mg m <sup>-3</sup> ]      | 1.133                                                                                         | 1.145                                                                                                           |
| Absorption coefficient [mm <sup>-1</sup> ]   | 1.446                                                                                         | 2.225                                                                                                           |
| $\theta$ range for data collection [°]       | 3.840 to 72.327                                                                               | 3.370 to 72.537                                                                                                 |
| Reflections collected                        | 18726                                                                                         | 112918                                                                                                          |
| Independent reflections                      | 5857 [ $R_{\text{int}}$ 0.023]                                                                | 29606 [ $R_{\text{int}}$ 0.079]                                                                                 |
| Reflections with $I > 2\sigma(I)$            | 5221                                                                                          | 24240                                                                                                           |
| Data/restraints/parameters                   | 5857/0/319                                                                                    | 29606/19/1633                                                                                                   |
| Final $R$ indices [ $I > 2\sigma(I)$ ]       | $R_1 = 0.029$ , $wR_2 = 0.074$                                                                | $R_1 = 0.055$ , $wR_2 = 0.139$                                                                                  |
| Final $R$ indices (all data)                 | $R_1 = 0.034$ , $wR_2 = 0.077$                                                                | $R_1 = 0.067$ , $wR_2 = 0.148$                                                                                  |
| GOOF on $F^2$                                | 1.013                                                                                         | 1.027                                                                                                           |
| Largest diff. peak/hole [e.Å <sup>-3</sup> ] | 0.27 and -0.24                                                                                | 1.02 and -0.46                                                                                                  |

**Table S2** Crystal structure and refinement data for **3**·Et<sub>2</sub>O and **4**·THF

|                                                     | <b>3</b> ·Et <sub>2</sub> O                                                                                   | <b>4</b> ·THF                                                                    |
|-----------------------------------------------------|---------------------------------------------------------------------------------------------------------------|----------------------------------------------------------------------------------|
| Empirical formula                                   | C <sub>66</sub> H <sub>112</sub> K <sub>2</sub> Mg <sub>2</sub> N <sub>4</sub> O <sub>6</sub> Si <sub>4</sub> | C <sub>42</sub> H <sub>68</sub> KMgN <sub>2</sub> O <sub>3</sub> Si <sub>2</sub> |
| CCDC Number                                         | 2357070                                                                                                       | 2357071                                                                          |
| <i>M<sub>r</sub></i>                                | 1296.77                                                                                                       | 768.57                                                                           |
| <i>T</i> [K]                                        | 120.0(2)                                                                                                      | 120.0(1)                                                                         |
| Crystal size [mm]                                   | 0.26 × 0.19 × 0.06                                                                                            | 0.44 × 0.25 × 0.12                                                               |
| Crystal system                                      | Triclinic                                                                                                     | Monoclinic                                                                       |
| Space group                                         | P $\bar{1}$ (No.2)                                                                                            | P2 <sub>1</sub> / <i>n</i> (alternative No.14)                                   |
| <i>a</i> [Å]                                        | 10.9645(3)                                                                                                    | 14.32120(19)                                                                     |
| <i>b</i> [Å]                                        | 15.9181(4)                                                                                                    | 20.5716(2)                                                                       |
| <i>c</i> [Å]                                        | 23.3852(5)                                                                                                    | 15.38509(18)                                                                     |
| $\alpha$ [°]                                        | 70.892(2)                                                                                                     | 90                                                                               |
| $\beta$ [°]                                         | 89.038(2)                                                                                                     | 94.3942(11)                                                                      |
| $\gamma$ [°]                                        | 72.072(3)                                                                                                     | 90                                                                               |
| <i>V</i> [Å <sup>3</sup> ]                          | 3653.35(17)                                                                                                   | 4519.27(9)                                                                       |
| <i>Z</i>                                            | 2                                                                                                             | 4                                                                                |
| <i>D</i> <sub>calc.</sub> [mg m <sup>-3</sup> ]     | 1.179                                                                                                         | 1.13                                                                             |
| Absorption coefficient [mm <sup>-1</sup> ]          | 2.323                                                                                                         | 1.95                                                                             |
| $\theta$ range for data collection [°]              | 4.019 to 72.476                                                                                               | 3.594 to 72.509                                                                  |
| Reflections collected                               | 48220                                                                                                         | 30357                                                                            |
| Independent reflections                             | 14383 [ <i>R</i> <sub>int</sub> 0.046]                                                                        | 8888 [ <i>R</i> <sub>int</sub> 0.027]                                            |
| Reflections with <i>I</i> > 2σ( <i>I</i> )          | 11814                                                                                                         | 8218                                                                             |
| Data/restraints/parameters                          | 14383/35/850                                                                                                  | 8888/33/497                                                                      |
| Final <i>R</i> indices [ <i>I</i> > 2σ( <i>I</i> )] | <i>R</i> <sub>1</sub> = 0.076, w <i>R</i> <sub>2</sub> = 0.228                                                | <i>R</i> <sub>1</sub> = 0.045, w <i>R</i> <sub>2</sub> = 0.121                   |
| Final <i>R</i> indices (all data)                   | <i>R</i> <sub>1</sub> = 0.089, w <i>R</i> <sub>2</sub> = 0.238                                                | <i>R</i> <sub>1</sub> = 0.048, w <i>R</i> <sub>2</sub> = 0.123                   |
| GOOF on <i>F</i> <sup>2</sup>                       | 1.11                                                                                                          | 1.049                                                                            |
| Largest diff. peak/hole [e.Å <sup>-3</sup> ]        | 0.98 and -0.65                                                                                                | 0.51 and -0.69                                                                   |

## Computational Details

DFT calculations were run with Gaussian 16 (A.03).<sup>S7</sup> The Mg, Si and K centres were described with the Stuttgart RECPs and associated basis sets,<sup>S8</sup> and the 6-31G\*\* basis set was used for all other atoms (BS1).<sup>S9</sup> A polarization function was also added to Si ( $\zeta_d = 0.284$ ) and K ( $\zeta_d = 1.000$ ). Initial BP86 optimizations were performed using the 'grid = ultrafine' option,<sup>S10</sup> with all stationary points being fully characterized via analytical frequency calculations as minima (all positive eigenvalues).

The Quantum Theory of Atoms in Molecules (QTAIM, AIMALL program<sup>S11</sup>) and Natural Bonding Orbital (NBO7<sup>S12</sup>) analyses were performed on the BP86-optimised<sup>10b</sup> geometry 4·THF (DFT-optimized). The QTAIM topological analyses used wavefunction files obtained with Gaussian 16 (C.01) at the BP86/6-311++G\*\* level, whilst NBO analyses were carried out with NBO 7 within Gaussian (C.01) at the same methodology level as the QTAIM calculations. Contour plots were generated in the AIMStudio package, using critical point (CP) visualisation threshold values of  $0.02 \text{ e}\cdot\text{\AA}^{-3}$  (solid line BCP = strong) and  $0.005 \text{ e}\cdot\text{\AA}^{-3}$  (dashed line BCP = weak). The NBO energies of donor-acceptor interactions (" $\Delta E^{(2)}$ ") between the various molecular fragments of the structures were estimated with second-order perturbation theory analysis of the Fock matrix in the NBO basis, as calculated by NBO7, with selected donor-acceptor NBO interactions provided. Wiberg bond indices (WBI) were calculated using NBO v7.0.

## NBO Analysis of $[\text{K}(\text{THF})_2]_2[(\text{NNO})\text{Mg}-\text{Mg}(\text{NNO})] \cdot 4\text{-THF}$

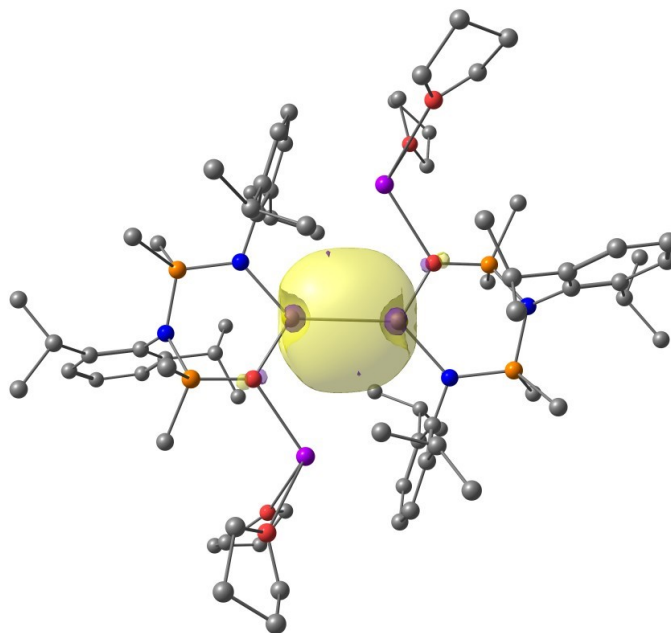

**Figure S25** – NBO162 of the DFT-optimized structure of 4-THF

- NBO-162 is a bonding orbital between Mg4 and Mg111
  - There is an equal 50% : 50% contribution from each Mg
  - From each Mg centre the atomic orbital contributions are further broken down to 93.1% (*s*) and 6.54% *p* (and 0.36% *d*)
  - There is a small (7.0 kcal/mol) NBO donor-acceptor value ( $\Delta E^{(2)}$ ) for the Mg–Mg bonding NBO162 to the lone vacant pairs on each of the K cations
  
- WBI (Wiberg Bond Index) data from NBO7 calculation:
  - Mg–Mg = 0.7244
  - Mg⋯K = 0.0263 / 0.0237
  - K⋯K = 0.0004

| Atom   | q(A)<br>(QTAIM) | NPA<br>(NBO7) |
|--------|-----------------|---------------|
| K1     | +0.878731       | +0.88240      |
| Mg4    | +1.325278       | +0.99653      |
| K108   | +0.878758       | +0.88240      |
| Mg111  | +1.325655       | +0.99653      |
| NNA215 | −0.717264       | -             |

QTAIM Analysis of  $[\text{K}(\text{THF})_2]_2[(\text{NNO})\text{Mg}-\text{Mg}(\text{NNO})] \cdot 4\text{THF}$

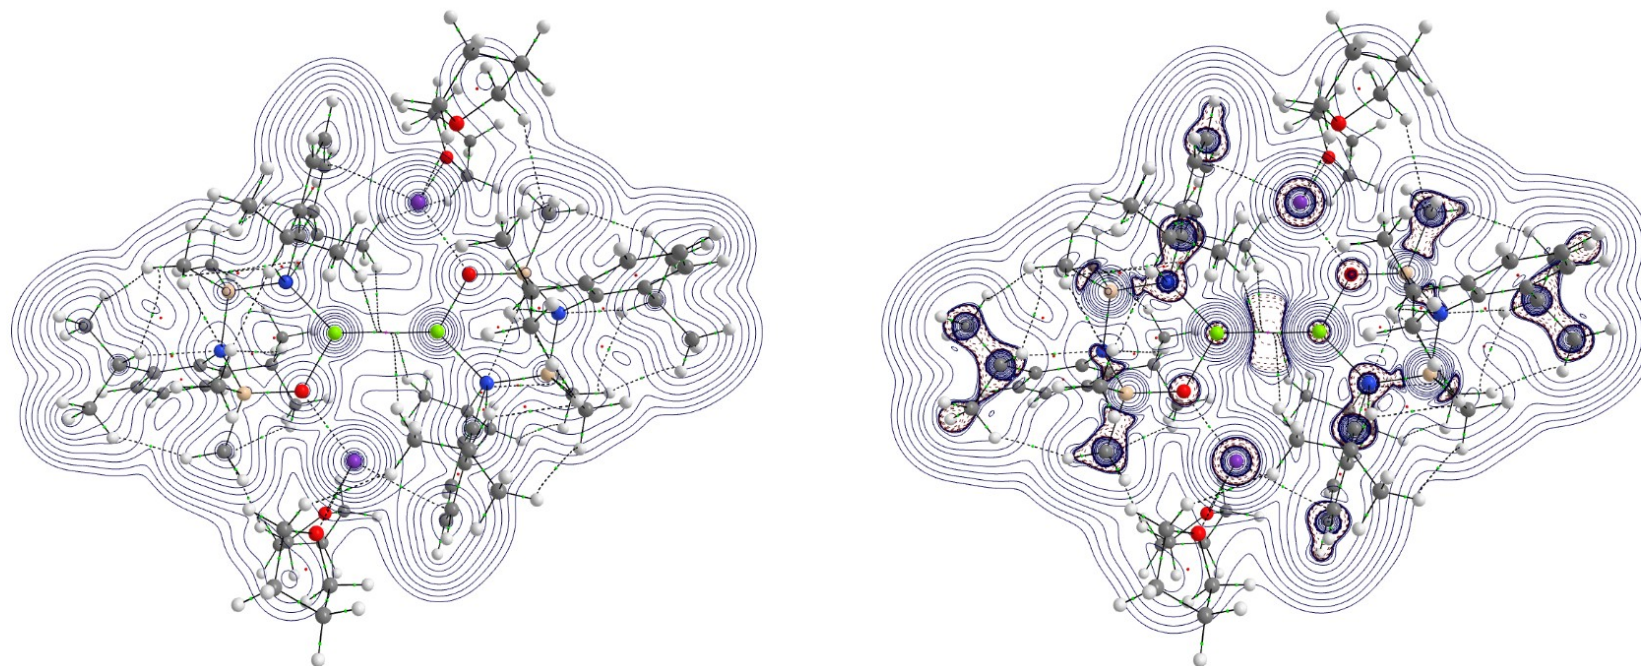

**Figure S26** - Contour plots of  $\rho(r)$  (*left*) and  $\nabla^2\rho(r)$  (*right*) of the DFT-optimized structure of  $4\cdot\text{THF}$

**Figure S27** Contour plot of  $\rho(r)$  of the DFT-optimized structure of 4·THF. All carbon atoms and their hydrogens have been omitted for clarity – with the exceptions of H22, H37, H129 and H144, which have distinct bond paths to the Non-Nuclear Attractor (NNA 215)

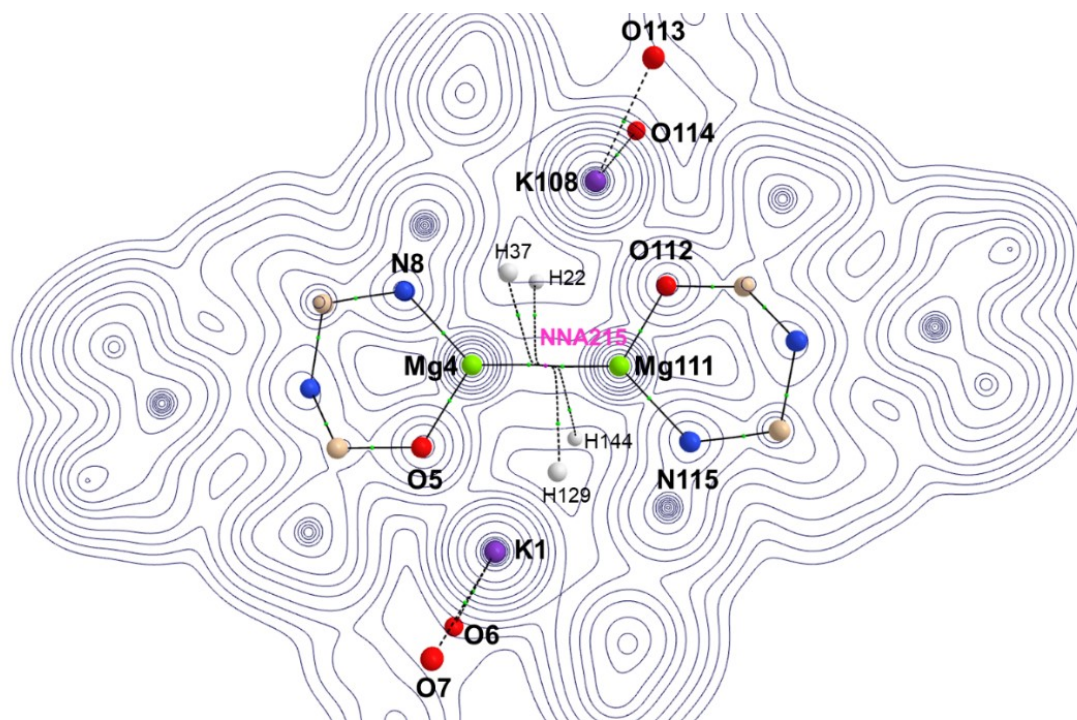

**Figure S28** Contour plot of  $\nabla^2\rho(r)$  of the DFT-optimized structure of 4-THF. All carbon atoms and their hydrogens have been omitted for clarity – with the exceptions of H22, H37, H129 and H144, which have distinct bond paths to the Non-Nuclear Attractor (NNA 215).

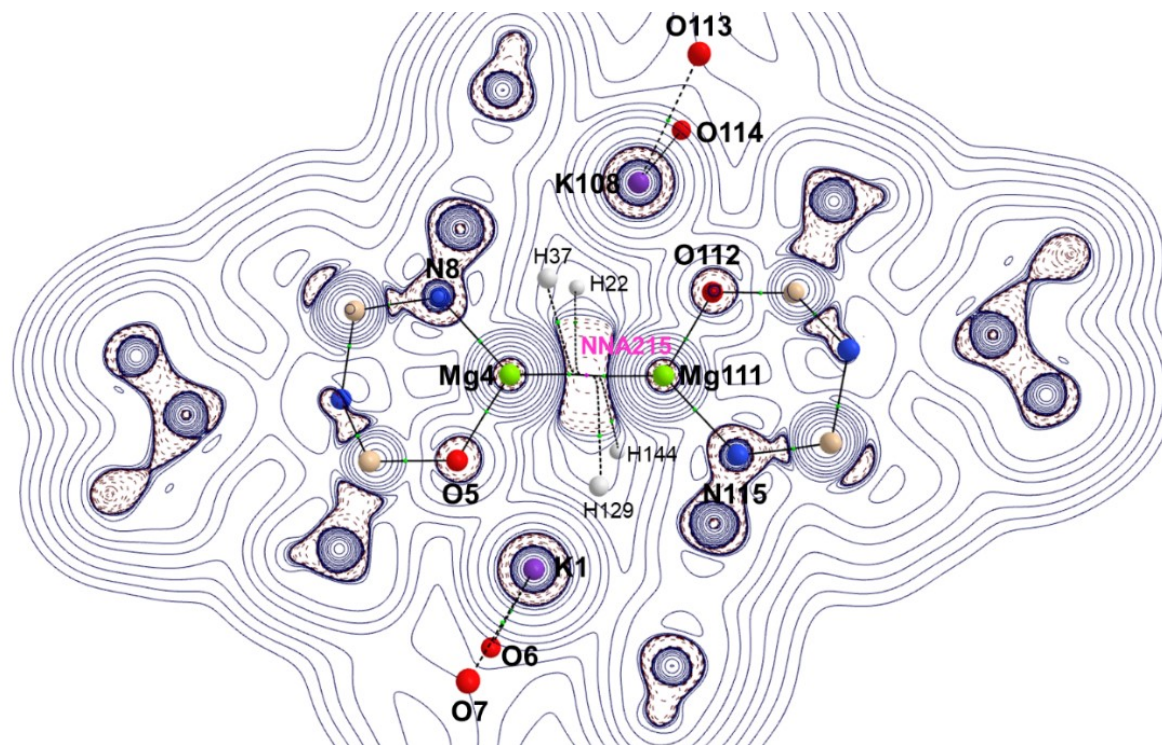



**Table S3.** Selected BCP data for 4·THF

| BCP            | $\rho(r)$ | $\nabla^2\rho(r)$ | $\varepsilon$ | $G(r)$    | $V(r)$    | $H(r)$    |
|----------------|-----------|-------------------|---------------|-----------|-----------|-----------|
| K1 - O5        | 0.023782  | +0.107162         | 0.038982      | +0.023763 | -0.020736 | -0.023571 |
| Mg4 - O5       | 0.050837  | +0.392784         | 0.021910      | +0.086063 | -0.073930 | -0.075388 |
| Mg4 - NNA215   | 0.025456  | -0.012253         | 0.144466      | +0.003893 | -0.010850 | -0.012261 |
| Mg4 - N8       | 0.042340  | +0.256764         | 0.117403      | +0.058330 | -0.052469 | -0.056279 |
| K1 - O6        | 0.014072  | +0.061265         | 0.138493      | +0.013007 | -0.010697 | -0.014236 |
| K1 - O7        | 0.013795  | +0.060268         | 0.136809      | +0.012764 | -0.010461 | -0.013966 |
| H22 - NNA215   | 0.005116  | +0.005821         | 0.294225      | +0.001407 | -0.001358 | -0.002393 |
| H37 - NNA215   | 0.006395  | +0.006039         | 0.342806      | +0.001628 | -0.001746 | -0.003205 |
| K108 - O112    | 0.023782  | +0.107162         | 0.038982      | +0.023763 | -0.020736 | -0.023571 |
| Mg111 - O112   | 0.050837  | +0.392784         | 0.021910      | +0.086063 | -0.073930 | -0.075388 |
| Mg111 - NNA215 | 0.025456  | -0.012253         | 0.144466      | +0.003893 | -0.010850 | -0.012261 |
| Mg111 - N115   | 0.042340  | +0.256764         | 0.117403      | +0.058330 | -0.052469 | -0.056279 |
| K108 - O113    | 0.014072  | +0.061265         | 0.138493      | +0.013007 | -0.010697 | -0.014236 |
| K108 - O114    | 0.013795  | +0.060268         | 0.136809      | +0.012764 | -0.010461 | -0.013966 |
| H129 - NNA215  | 0.005116  | +0.005821         | 0.294225      | +0.001407 | -0.001358 | -0.002393 |
| H144 - NNA215  | 0.006395  | +0.006039         | 0.342806      | +0.001628 | -0.001746 | -0.003205 |

**Table S4** Selected QTAIM atomic data for 4·THF.

| Atom   | q(A)      | L(A)      | N(A)      | Vol(A)     | %Loc(A)   |
|--------|-----------|-----------|-----------|------------|-----------|
| K1     | +0.878731 | +0.000142 | 18.121269 | 151.527358 | 98.441558 |
| Mg4    | +1.325278 | -0.000187 | 10.674722 | 98.457146  | 94.374242 |
| O5     | -1.629642 | +0.000013 | 9.629642  | 148.926518 | 91.562033 |
| O6     | -0.971093 | +0.000069 | 8.971093  | 104.127090 | 86.698555 |
| O7     | -0.970668 | +0.000011 | 8.970668  | 103.062348 | 86.616922 |
| N8     | -1.707230 | -0.000057 | 8.707230  | 119.138343 | 82.871362 |
| H22    | +0.002554 | +0.000051 | 0.997446  | 55.192451  | 41.479728 |
| H37    | -0.011090 | +0.000035 | 1.011090  | 58.193534  | 41.412596 |
| K108   | +0.878758 | +0.000170 | 18.121242 | 151.496271 | 98.441657 |
| Mg111  | +1.325655 | +0.000005 | 10.674345 | 98.436061  | 94.376911 |
| O112   | -1.629928 | -0.000269 | 9.629928  | 149.089365 | 91.560229 |
| O113   | -0.971134 | +0.000033 | 8.971134  | 104.105734 | 86.698281 |
| O114   | -0.970594 | +0.000097 | 8.970594  | 103.029328 | 86.617245 |
| N115   | -1.707233 | -0.000049 | 8.707233  | 119.124516 | 82.871108 |
| H129   | +0.002544 | +0.000042 | 0.997456  | 55.214332  | 41.479474 |
| H144   | -0.011070 | +0.000052 | 1.011070  | 58.209315  | 41.412902 |
| NNA215 | -0.717264 | -0.000122 | 0.717264  | 95.257250  | 31.362997 |

## References

- S1. R. Fischer, H. Görls, P. R. Meisinger, R. Suxdorf and M. Westerhausen, *Chem. Eur. J.*, 2019, **25**, 12830-12841.
- S2. F. Haftbaradaran, G. Mund, R. J. Batchelor, J. F. Britten and D. B. Leznoff, *Dalton Trans.*, 2005, 2343-2345.
- S3. R. Blessing, *Acta Cryst.*, 1995, **A51**, 33-38.
- S4. G. M. Sheldrick, *Acta Cryst.*, 2008, **A64**, 112-122.
- S5. SHELXL-97, G. M. Sheldrick, University of Gottingen, Germany, 1997
- S6. L. J. Farrugia, *J. Appl. Cryst.*, 1999, **32**, 837-838.
- S7. Gaussian 16 Revision C.01, M. J. Frisch, G. W. Trucks, H. B. Schlegel, G. E. Scuseria, M. A. Robb, J. R. Cheeseman, G. Scalmani, V. Barone, G. A. Petersson, H. Nakatsuji, X. Li, M. Caricato, A. V. Marenich, J. Bloino, B. G. Janesko, R. Gomperts, B. Mennucci, H. P. Hratchian, J. V. Ortiz, A. F. Izmaylov, J. L. Sonnenberg, Williams, F. Ding, F. Lipparini, F. Egidi, J. Goings, B. Peng, A. Petrone, T. Henderson, D. Ranasinghe, V. G. Zakrzewski, J. Gao, N. Rega, G. Zheng, W. Liang, M. Hada, M. Ehara, K. Toyota, R. Fukuda, J. Hasegawa, M. Ishida, T. Nakajima, Y. Honda, O. Kitao, H. Nakai, T. Vreven, K. Throssell, J. A. Montgomery Jr., J. E. Peralta, F. Ogliaro, M. J. Bearpark, J. J. Heyd, E. N. Brothers, K. N. Kudin, V. N. Staroverov, T. A. Keith, R. Kobayashi, J. Normand, K. Raghavachari, A. P. Rendell, J. C. Burant, S. S. Iyengar, J. Tomasi, M. Cossi, J. M. Millam, M. Klene, C. Adamo, R. Cammi, J. W. Ochterski, R. L. Martin, K. Morokuma, O. Farkas, J. B. Foresman and D. J. Fox, Wallingford, CT, 2016
- S8. D. Andrae, U. Häußermann, M. Dolg, H. Stoll and H. Preuß, *Theor. Chim. Acta*, 1990, **77**, 123-141.
- S9. (a) P. C. Hariharan and J. A. Pople, *Theor. Chim. Acta*, 1973, **28**, 213-222; (b) W. J. Hehre, R. Ditchfield and J. A. Pople, *J. Chem. Phys.*, 1972, **56**, 2257-2261.
- S10. (a) A. D. Becke, *Phys. Rev. A*, 1988, **38**, 3098-3100; (b) J. P. Perdew, *Phys. Rev. B*, 1986, **33**, 8822-8824.
- S11. AIMAll (Version 19.10.12), Todd A. Keith, TK Gristmill Software, Overland Park KS, USA, 2019 (aim.tkgristmill.com).
- S12. NBO 7.0, E. D. Glendening, J. Badenhoop, K., A. E. Reed, J. E. Carpenter, J. A. Bohmann, C. M. Morales, P. Karafiloglou, C. R. Landis and F. Weinhold, Theoretical Chemistry Institute, University of Wisconsin, Madison., 2018

**Computed Energies and Cartesian Coordinates**

|                                             |          |          |          |          |          |          |          |
|---------------------------------------------|----------|----------|----------|----------|----------|----------|----------|
| <b>4·THF</b>                                |          |          | C        | 0.81473  | 6.04311  | 0.81175  |          |
| SCF (BP86) Energy = -3563.22142671          |          |          | C        | -0.95163 | 7.50352  | -2.32942 |          |
| Enthalpy 0K = -3561.431761                  |          |          | H        | -1.27399 | 6.48933  | -2.61977 |          |
| Enthalpy 298K = -3561.310204                |          |          | C        | -2.21711 | 8.35716  | -2.08141 |          |
| Free Energy 298K = -3561.608661             |          |          | H        | -1.95179 | 9.39208  | -1.79969 |          |
| Lowest Frequency = 7.3216 cm <sup>-1</sup>  |          |          | H        | -2.83476 | 7.94154  | -1.26780 |          |
| Second Frequency = 12.6353 cm <sup>-1</sup> |          |          | H        | -2.84005 | 8.40799  | -2.99244 |          |
| C                                           | -0.13830 | 8.10124  | -3.49960 | C        | -0.13830 | 8.10124  | -3.49960 |
| H                                           | 0.75862  | 7.49986  | -3.72287 | H        | 0.75862  | 7.49986  | -3.72287 |
| H                                           | 0.19880  | 9.12930  | -3.27595 | H        | 0.19880  | 9.12930  | -3.27595 |
| H                                           | -0.75421 | 8.14734  | -4.41547 | H        | -0.75421 | 8.14734  | -4.41547 |
| C                                           | 1.04144  | 4.73746  | 1.57629  | C        | 1.04144  | 4.73746  | 1.57629  |
| H                                           | 0.41071  | 3.96854  | 1.09628  | H        | 0.41071  | 3.96854  | 1.09628  |
| C                                           | 0.63180  | 4.83921  | 3.06261  | C        | 0.63180  | 4.83921  | 3.06261  |
| H                                           | -0.40984 | 5.18157  | 3.17800  | H        | -0.40984 | 5.18157  | 3.17800  |
| H                                           | 1.27572  | 5.54527  | 3.61725  | H        | 1.27572  | 5.54527  | 3.61725  |
| H                                           | 0.72456  | 3.85438  | 3.55376  | H        | 0.72456  | 3.85438  | 3.55376  |
| C                                           | 2.51175  | 4.27047  | 1.47712  | C        | 2.51175  | 4.27047  | 1.47712  |
| H                                           | 3.18892  | 5.01162  | 1.94105  | H        | 3.18892  | 5.01162  | 1.94105  |
| H                                           | 2.82703  | 4.13286  | 0.43025  | H        | 2.82703  | 4.13286  | 0.43025  |
| H                                           | 2.64887  | 3.31044  | 2.00782  | H        | 2.64887  | 3.31044  | 2.00782  |
| C                                           | 2.12160  | 4.91807  | -2.48243 | C        | 2.12160  | 4.91807  | -2.48243 |
| H                                           | 2.83232  | 4.26724  | -3.02418 | H        | 2.83232  | 4.26724  | -3.02418 |
| H                                           | 2.60423  | 5.27571  | -1.55791 | H        | 2.60423  | 5.27571  | -1.55791 |
| H                                           | 1.92009  | 5.79868  | -3.11451 | H        | 1.92009  | 5.79868  | -3.11451 |
| C                                           | -0.38937 | 3.65355  | -3.75007 | C        | -0.38937 | 3.65355  | -3.75007 |
| H                                           | -1.29853 | 3.04645  | -3.60414 | H        | -1.29853 | 3.04645  | -3.60414 |
| H                                           | 0.25688  | 3.10511  | -4.45843 | H        | 0.25688  | 3.10511  | -4.45843 |
| H                                           | -0.68470 | 4.60625  | -4.22213 | H        | -0.68470 | 4.60625  | -4.22213 |
| C                                           | 3.21698  | 2.12726  | -5.28574 | C        | 3.21698  | 2.12726  | -5.28574 |
| H                                           | 2.65176  | 3.05948  | -5.11419 | H        | 2.65176  | 3.05948  | -5.11419 |
| H                                           | 2.49706  | 1.29006  | -5.35865 | H        | 2.49706  | 1.29006  | -5.35865 |
| C                                           | 4.13908  | 2.19520  | -6.51518 | C        | 4.13908  | 2.19520  | -6.51518 |
| H                                           | 3.64453  | 1.83348  | -7.43084 | H        | 3.64453  | 1.83348  | -7.43084 |
| H                                           | 4.47186  | 3.23276  | -6.69537 | H        | 4.47186  | 3.23276  | -6.69537 |
| C                                           | 5.33132  | 1.32171  | -6.07696 | C        | 5.33132  | 1.32171  | -6.07696 |
| H                                           | 6.25681  | 1.52944  | -6.63808 | H        | 6.25681  | 1.52944  | -6.63808 |
| H                                           | 5.08997  | 0.25013  | -6.19107 | H        | 5.08997  | 0.25013  | -6.19107 |
| C                                           | 5.44119  | 1.68837  | -4.59303 | C        | 5.44119  | 1.68837  | -4.59303 |
| H                                           | 5.89698  | 0.90089  | -3.96874 | H        | 5.89698  | 0.90089  | -3.96874 |
| H                                           | 6.02243  | 2.62444  | -4.45761 | H        | 6.02243  | 2.62444  | -4.45761 |
| C                                           | 6.06728  | 3.17692  | 0.54322  | C        | 6.06728  | 3.17692  | 0.54322  |
| H                                           | 6.45833  | 2.15697  | 0.70347  | H        | 6.45833  | 2.15697  | 0.70347  |
| H                                           | 5.33035  | 3.40052  | 1.33893  | H        | 5.33035  | 3.40052  | 1.33893  |
| C                                           | 7.16599  | 4.24923  | 0.48189  | C        | 7.16599  | 4.24923  | 0.48189  |
| H                                           | 7.40160  | 4.66739  | 1.47376  | H        | 7.40160  | 4.66739  | 1.47376  |
| H                                           | 8.09599  | 3.83039  | 0.05765  | H        | 8.09599  | 3.83039  | 0.05765  |
| C                                           | 6.55003  | 5.27692  | -0.48748 | C        | 6.55003  | 5.27692  | -0.48748 |
| H                                           | 5.80806  | 5.90570  | 0.03504  | H        | 5.80806  | 5.90570  | 0.03504  |
| H                                           | 7.29536  | 5.93968  | -0.95623 | H        | 7.29536  | 5.93968  | -0.95623 |
| C                                           | 5.85289  | 4.36084  | -1.50020 | C        | 5.85289  | 4.36084  | -1.50020 |
| H                                           | 4.98154  | 4.82376  | -1.99192 | H        | 4.98154  | 4.82376  | -1.99192 |
| H                                           | 6.56314  | 4.02100  | -2.28277 | H        | 6.56314  | 4.02100  | -2.28277 |
| K                                           | -3.33391 | -1.43387 | -1.45883 | K        | -3.33391 | -1.43387 | -1.45883 |
| Si                                          | 2.12500  | -4.32658 | -0.49361 | Si       | 2.12500  | -4.32658 | -0.49361 |
| Si                                          | -0.53959 | -3.91775 | -2.10356 | Si       | -0.53959 | -3.91775 | -2.10356 |
| Mg                                          | 0.33360  | -1.40785 | 0.40235  | Mg       | 0.33360  | -1.40785 | 0.40235  |
| O                                           | -0.94603 | -2.45126 | 1.44083  | O        | -0.94603 | -2.45126 | 1.44083  |
| O                                           | -5.38689 | -3.21324 | 0.74224  | O        | -5.38689 | -3.21324 | 0.74224  |
| O                                           | -4.08048 | -1.88604 | 4.13546  | O        | -4.08048 | -1.88604 | 4.13546  |
| N                                           | 2.03447  | -2.59462 | 0.14229  | N        | 2.03447  | -2.59462 | 0.14229  |
| N                                           | 0.48517  | -4.89142 | 0.98408  | N        | 0.48517  | -4.89142 | 0.98408  |

|   |          |          |          |   |          |          |          |
|---|----------|----------|----------|---|----------|----------|----------|
| C | 3.23610  | -1.97454 | -0.26210 | H | 1.95179  | -9.39208 | 1.79969  |
| C | 3.62773  | -1.93258 | -1.65377 | H | 2.83476  | -7.94154 | 1.26780  |
| C | 4.85497  | -1.34897 | -2.02857 | H | 2.84005  | -8.40799 | 2.99244  |
| H | 5.14854  | -1.36623 | -3.08552 | C | 0.13830  | -8.10124 | 3.49960  |
| C | 5.71641  | -0.76540 | -1.08629 | H | -0.75862 | -7.49986 | 3.72287  |
| H | 6.68221  | -0.34726 | -1.39189 | H | -0.19880 | -9.12930 | 3.27595  |
| C | 5.31822  | -0.73994 | 0.25910  | H | 0.75421  | -8.14734 | 4.41547  |
| H | 5.98038  | -0.28285 | 1.00480  | C | -1.04144 | -4.73746 | -1.57629 |
| C | 4.10832  | -1.32130 | 0.68882  | H | -0.41071 | -3.96854 | -1.09628 |
| C | 2.69726  | -2.46457 | -2.74486 | C | -0.63180 | -4.83921 | -3.06261 |
| H | 1.95270  | -3.09749 | -2.23427 | H | 0.40984  | -5.18157 | -3.17800 |
| C | 1.92636  | -1.29882 | -3.40909 | H | -1.27572 | -5.54527 | -3.61725 |
| H | 1.31250  | -0.74990 | -2.67009 | H | -0.72456 | -3.85438 | -3.55376 |
| H | 2.62667  | -0.58217 | -3.87959 | C | -2.51175 | -4.27047 | -1.47712 |
| H | 1.24528  | -1.67131 | -4.19598 | H | -3.18892 | -5.01162 | -1.94105 |
| C | 3.41168  | -3.30917 | -3.81930 | H | -2.82703 | -4.13286 | -0.43025 |
| H | 4.10031  | -2.70117 | -4.43472 | H | -2.64887 | -3.31044 | -2.00782 |
| H | 3.99572  | -4.13035 | -3.37309 | C | -2.12160 | -4.91807 | 2.48243  |
| H | 2.67195  | -3.75286 | -4.50873 | H | -2.83232 | -4.26724 | 3.02418  |
| C | 3.72475  | -1.22734 | 2.16624  | H | -2.60423 | -5.27571 | 1.55791  |
| H | 2.91085  | -1.95831 | 2.31391  | H | -1.92009 | -5.79868 | 3.11451  |
| C | 4.87642  | -1.57683 | 3.13144  | C | 0.38937  | -3.65355 | 3.75007  |
| H | 5.30991  | -2.56504 | 2.90778  | H | 1.29853  | -3.04645 | 3.60414  |
| H | 5.69220  | -0.83201 | 3.09012  | H | -0.25688 | -3.10511 | 4.45843  |
| H | 4.50903  | -1.59349 | 4.17271  | H | 0.68470  | -4.60625 | 4.22213  |
| C | 3.15540  | 0.17115  | 2.50142  | C | -3.21698 | -2.12726 | 5.28574  |
| H | 3.91260  | 0.95852  | 2.32458  | H | -2.65176 | -3.05948 | 5.11419  |
| H | 2.26814  | 0.40374  | 1.88049  | H | -2.49706 | -1.29006 | 5.35865  |
| H | 2.84922  | 0.23184  | 3.56162  | C | -4.13908 | -2.19520 | 6.51518  |
| C | 2.70379  | -5.43123 | -0.95065 | H | -3.64453 | -1.83348 | 7.43084  |
| H | 2.04326  | -5.39455 | -1.82996 | H | -4.47186 | -3.23276 | 6.69537  |
| H | 3.71494  | -5.11838 | -1.26377 | C | -5.33132 | -1.32171 | 6.07696  |
| H | 2.76606  | -6.48336 | -0.62390 | H | -6.25681 | -1.52944 | 6.63808  |
| C | 3.41581  | -4.68710 | 1.86086  | H | -5.08997 | -0.25013 | 6.19107  |
| H | 4.38837  | -4.25093 | 1.57123  | C | -5.44119 | -1.68837 | 4.59303  |
| H | 3.13637  | -4.27191 | 2.84204  | H | -5.89698 | -0.90089 | 3.96874  |
| H | 3.56386  | -5.77378 | 1.98100  | H | -6.02243 | -2.62444 | 4.45761  |
| C | -0.06238 | -6.09286 | 0.40544  | C | -6.06728 | -3.17692 | -0.54322 |
| C | 0.12183  | -7.35635 | 1.05231  | H | -6.45833 | -2.15697 | -0.70347 |
| C | -0.45729 | -8.51263 | 0.49366  | H | -5.33035 | -3.40052 | -1.33893 |
| H | -0.31136 | -9.47665 | 0.99575  | C | -7.16599 | -4.24923 | -0.48189 |
| C | -1.21087 | -8.45909 | -0.68346 | H | -7.40160 | -4.66739 | -1.47376 |
| H | -1.65623 | -9.36901 | -1.10067 | H | -8.09599 | -3.83039 | -0.05765 |
| C | -1.37878 | -7.22747 | -1.32585 | C | -6.55003 | -5.27692 | 0.48748  |
| H | -1.95993 | -7.18084 | -2.25468 | H | -5.80806 | -5.90570 | -0.03504 |
| C | -0.81473 | -6.04311 | -0.81175 | H | -7.29536 | -5.93968 | 0.95623  |
| C | 0.95163  | -7.50352 | 2.32942  | C | -5.85289 | -4.36084 | 1.50020  |
| H | 1.27399  | -6.48933 | 2.61977  | H | -4.98154 | -4.82376 | 1.99192  |
| C | 2.21711  | -8.35716 | 2.08141  | H | -6.56314 | -4.02100 | 2.28277  |
